# Supplementary material for: Pardaxin, an Antimicrobial Peptide, Triggers Caspase-Dependent and ROS-Mediated Apoptosis in HT-1080 Cells
Source: PubMed Central journal article supplement (PMC3210615; doi:10.3390/md9101995), 2011-10-19
Supplement: marinedrugs-09-01955-s001.pdf [file marinedrugs-09-01955-s001.pdf]

# SUPPORTING INFORMATION

## Bioactive Cembranoids from the Soft Coral *Sinularia crassa*

**Chih-Hua Chao**<sup>1,2</sup>, **Kuei-Ju Chou**<sup>1</sup>, **Chiung-Yao Huang**<sup>1</sup>, **Zhi-Hong Wen**<sup>1,3</sup>, **Chi-Hsin Hsu**<sup>1,3</sup>, **Yang-Chang Wu**<sup>4</sup>, **Chang-Feng Dai**<sup>5</sup>, and **Jyh-Horng Sheu**<sup>1,3,\*</sup>

<sup>1</sup> Department of Marine Biotechnology and Resources, National Sun Yat-Sen University, Kaohsiung 804, Taiwan; E-Mails: [chaochihhua@hotmail.com](mailto:chaochihhua@hotmail.com)

(C.-H.C.); [jzusmile@hotmail.com](mailto:jzusmile@hotmail.com) (K.-J.C.); [betty8575@yahoo.com.tw](mailto:betty8575@yahoo.com.tw) (C.-Y.H.)

<sup>2</sup> Chinese Medicinal Research and Development Center, China Medical University and Hospital, Taichung 404, Taiwan, ROC

<sup>3</sup> Asian Pacific Ocean Research Center, National Sun Yat-sen University, Kaohsiung 804, Taiwan

E-Mails: [wzh@mail.nsysu.edu.tw](mailto:wzh@mail.nsysu.edu.tw) (Z.-H.W.); [hsuch@mail.nsysu.edu.tw](mailto:hsuch@mail.nsysu.edu.tw) (C.-H.H.)

<sup>4</sup> College of Chinese Medicine, China Medical University, Taichung 404, Taiwan

E-Mail: [yachwu@mail.cmu.edu.tw](mailto:yachwu@mail.cmu.edu.tw) (Y.-C.W.)

<sup>5</sup> Institute of Oceanography, National Taiwan University, Taipei, Taiwan;

E-Mail: [corallab@ntu.edu.tw](mailto:corallab@ntu.edu.tw) (C.-F.D.)

**For compound 1:**

**S1-1.**  $^1\text{H}$  NMR spectrum (400 MHz) of compound **1** in  $\text{CDCl}_3$ .

**S1-2.**  $^{13}\text{C}$  NMR spectrum (100 MHz) of compound **1** in  $\text{CDCl}_3$ .

**S1-3.**  $^1\text{H}$  NMR spectrum (400 MHz) of compound **1** in  $\text{C}_5\text{D}_5\text{N}$ .

**S1-4.**  $^{13}\text{C}$  NMR spectrum (400 MHz) of compound **1** in  $\text{C}_5\text{D}_5\text{N}$ .

**For compound 2:**

**S2-1.**  $^1\text{H}$  NMR spectrum (500 MHz) of compound **2** in  $\text{CDCl}_3$ .

**S2-2.**  $^{13}\text{C}$  NMR spectrum (125 MHz) of compound **2** in  $\text{CDCl}_3$ .

**S2-3.**  $^1\text{H}$  NMR spectrum (300 MHz) of compound **2** in  $\text{CDCl}_3$ .

**S2-4.**  $^1\text{H}$  NMR spectrum (300 MHz) of acetate **1a** in  $\text{CDCl}_3$ .

**For compound 3:**

**S3-1.**  $^1\text{H}$  NMR spectrum (400 MHz) of compound **3** in  $\text{CDCl}_3$ .

**S3-2.**  $^{13}\text{C}$  NMR spectrum (100 MHz) of compound **3** in  $\text{CDCl}_3$ .

**For compound 4:**

**S4-1.**  $^1\text{H}$  NMR spectrum (400 MHz) of compound **4** in  $\text{CDCl}_3$ .

**S4-2.**  $^{13}\text{C}$  NMR spectrum (100 MHz) of compound **4** in  $\text{CDCl}_3$ .

**For compound 5:**

**S5-1.**  $^1\text{H}$  NMR spectrum (400 MHz) of compound **5** in  $\text{CDCl}_3$ .

**S5-2.**  $^{13}\text{C}$  NMR spectrum (100 MHz) of compound **5** in  $\text{CDCl}_3$ .

**For compound 6:**

**S6-1.**  $^1\text{H}$  NMR spectrum (400 MHz) of compound **6** in  $\text{C}_6\text{D}_6$ .

**S6-2.**  $^{13}\text{C}$  NMR spectrum (100 MHz) of compound **6** in  $\text{C}_6\text{D}_6$ .

**For compound 7:**

**S7-1.**  $^1\text{H}$  NMR spectrum (400 MHz) of compound **7** in  $\text{C}_6\text{D}_6$ .

**S7-2.**  $^{13}\text{C}$  NMR spectrum (100 MHz) of compound **7** in  $\text{C}_6\text{D}_6$ .

**For compound 8:**

**S8-1.**  $^1\text{H}$  NMR spectrum (400 MHz) of compound **8** in  $\text{C}_6\text{D}_6$ .

**S8-2.**  $^{13}\text{C}$  NMR spectrum (100 MHz) of compound **8** in  $\text{C}_6\text{D}_6$ .

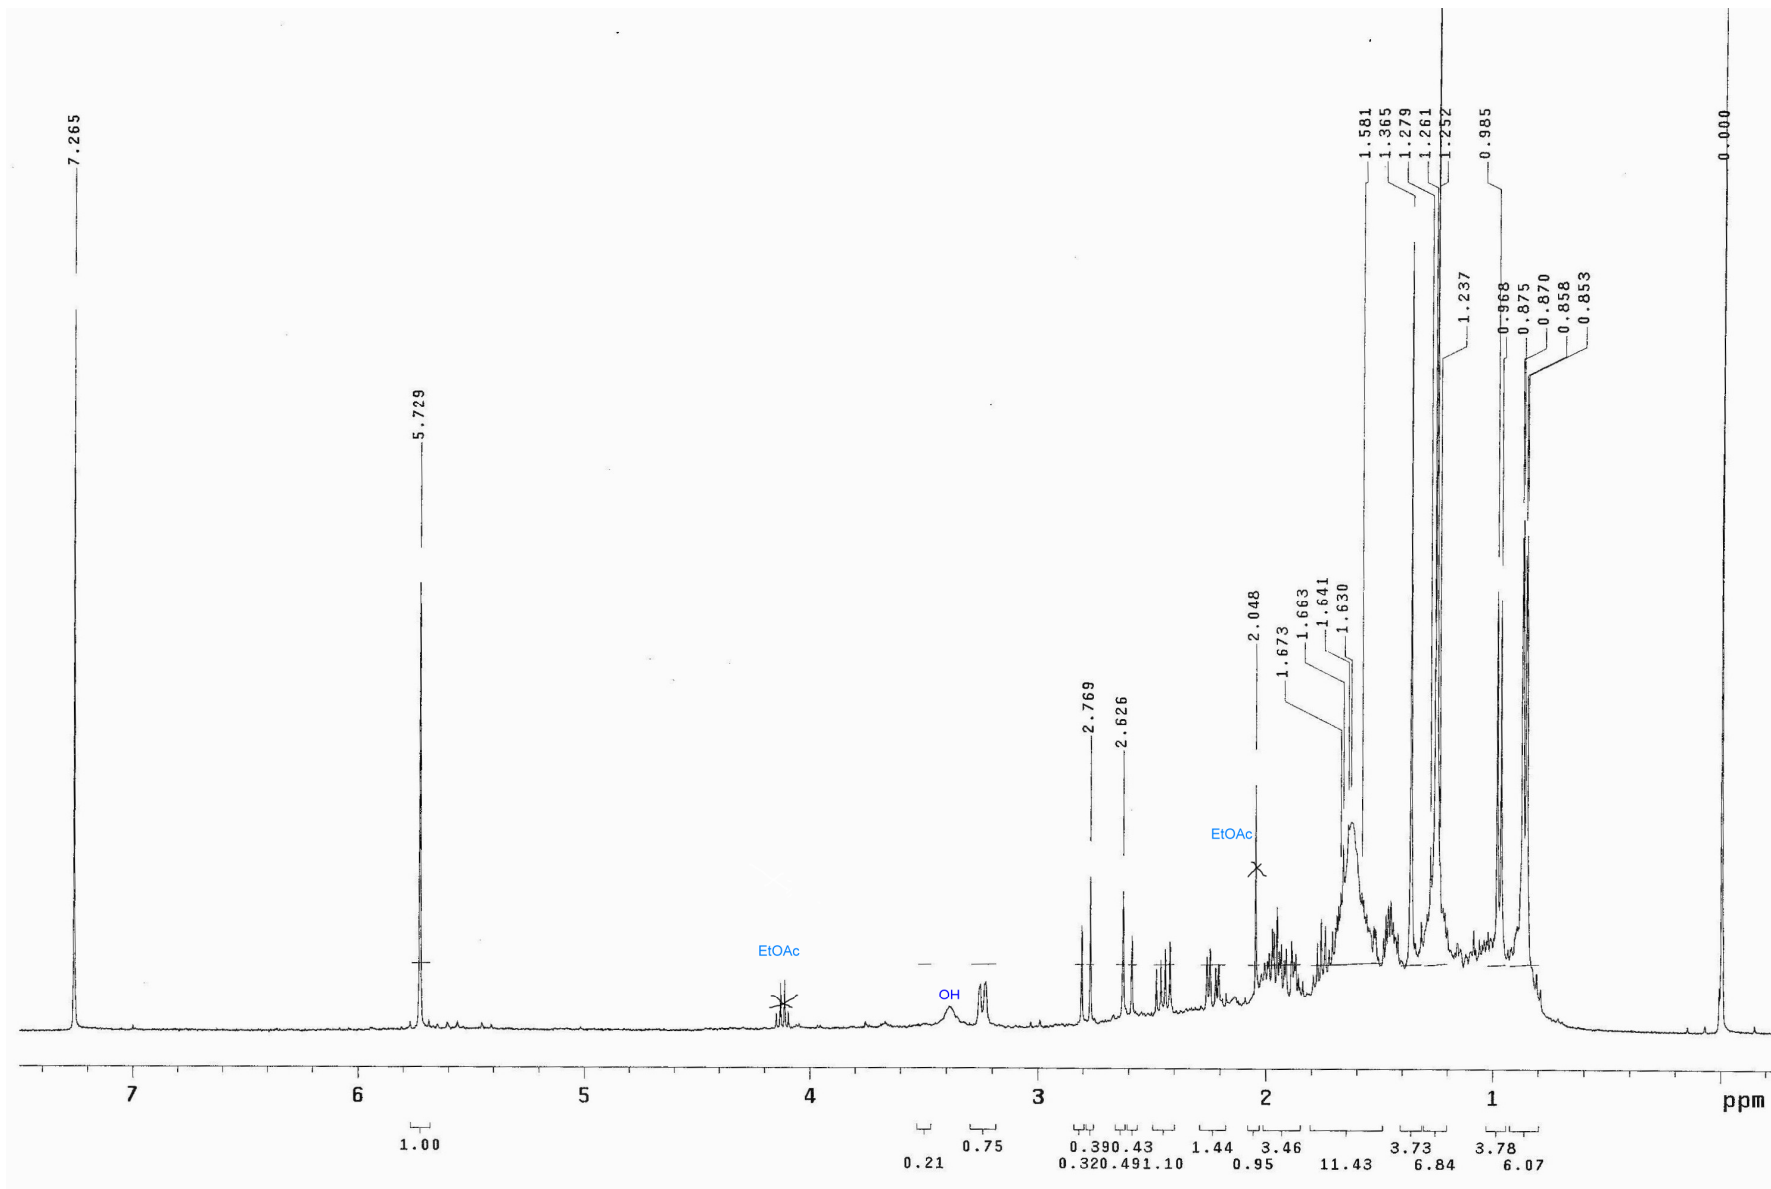

S1-1.  $^1\text{H}$  NMR spectrum (400 MHz) of compound **1** in  $\text{CDCl}_3$ .

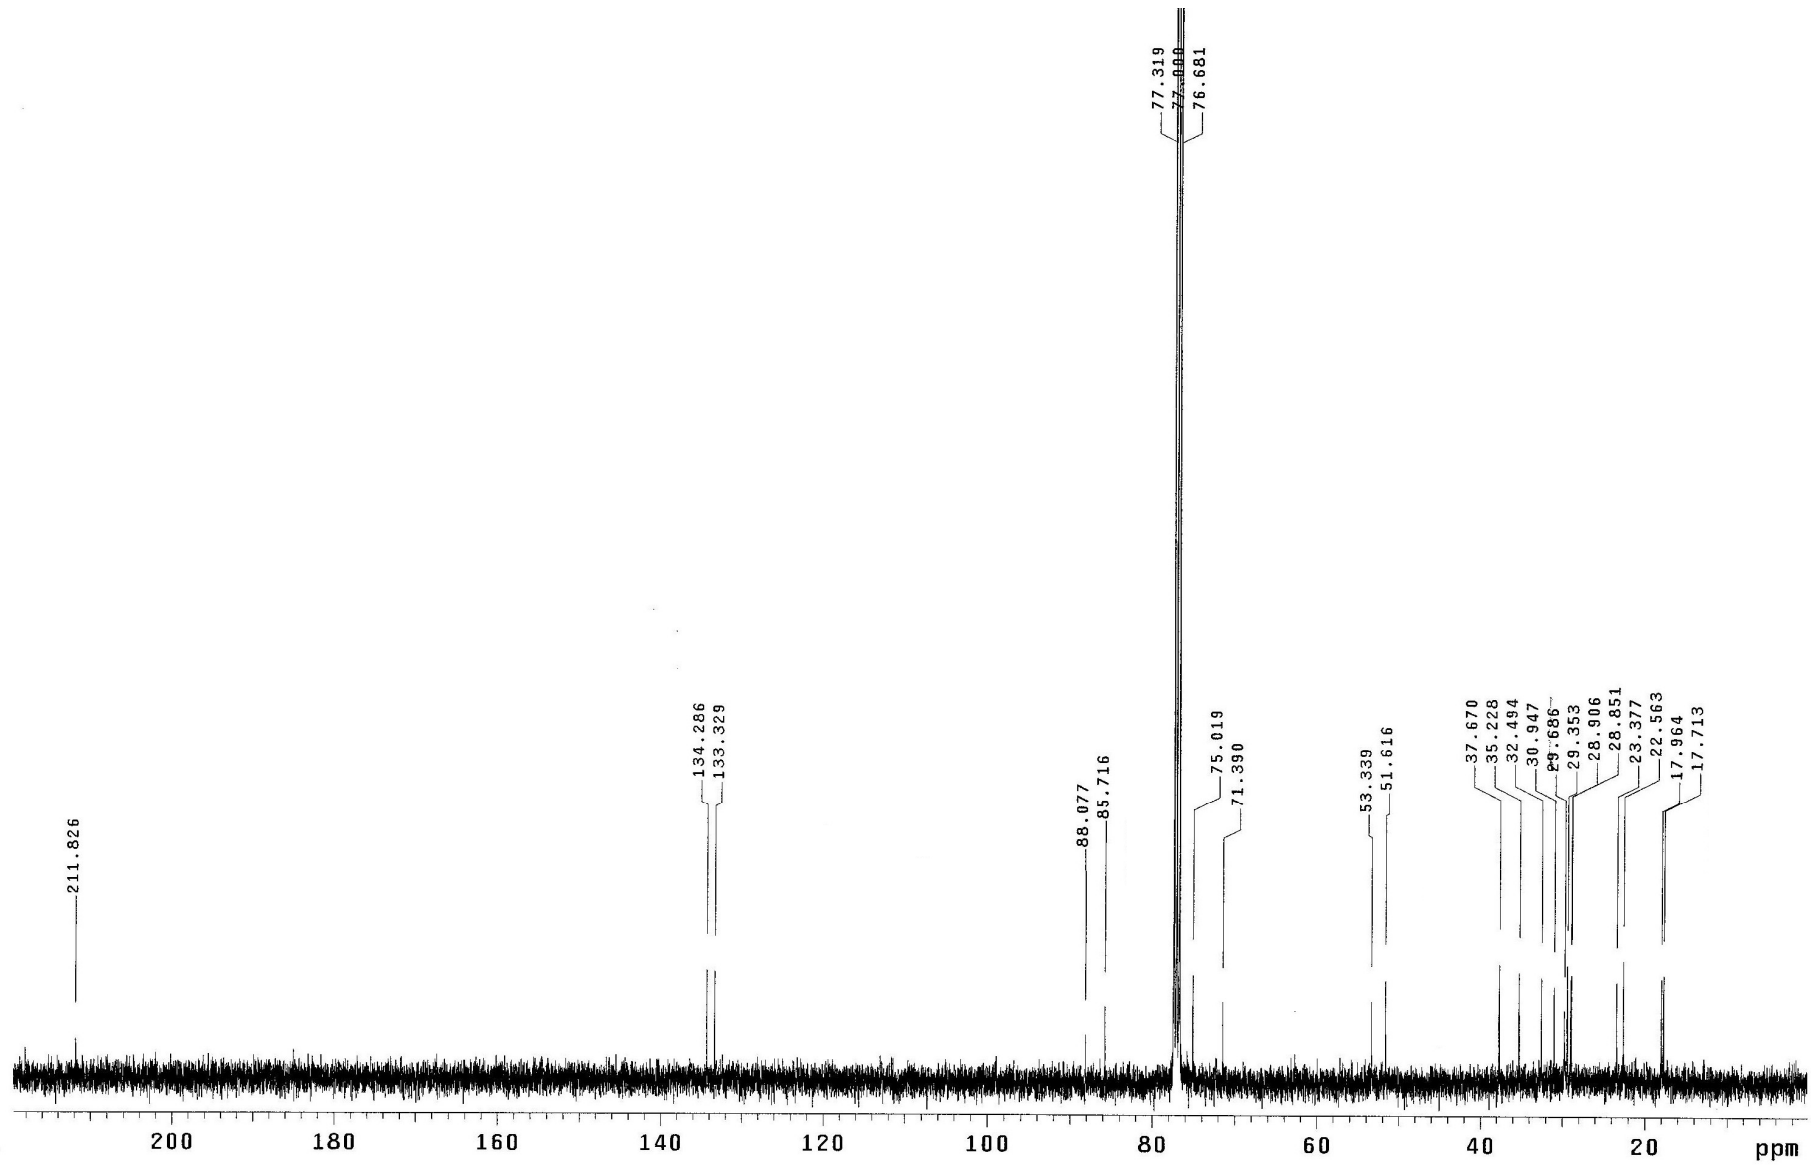

S1-2. <sup>13</sup>C NMR spectrum (400 MHz) of compound 1 in CDCl<sub>3</sub>.

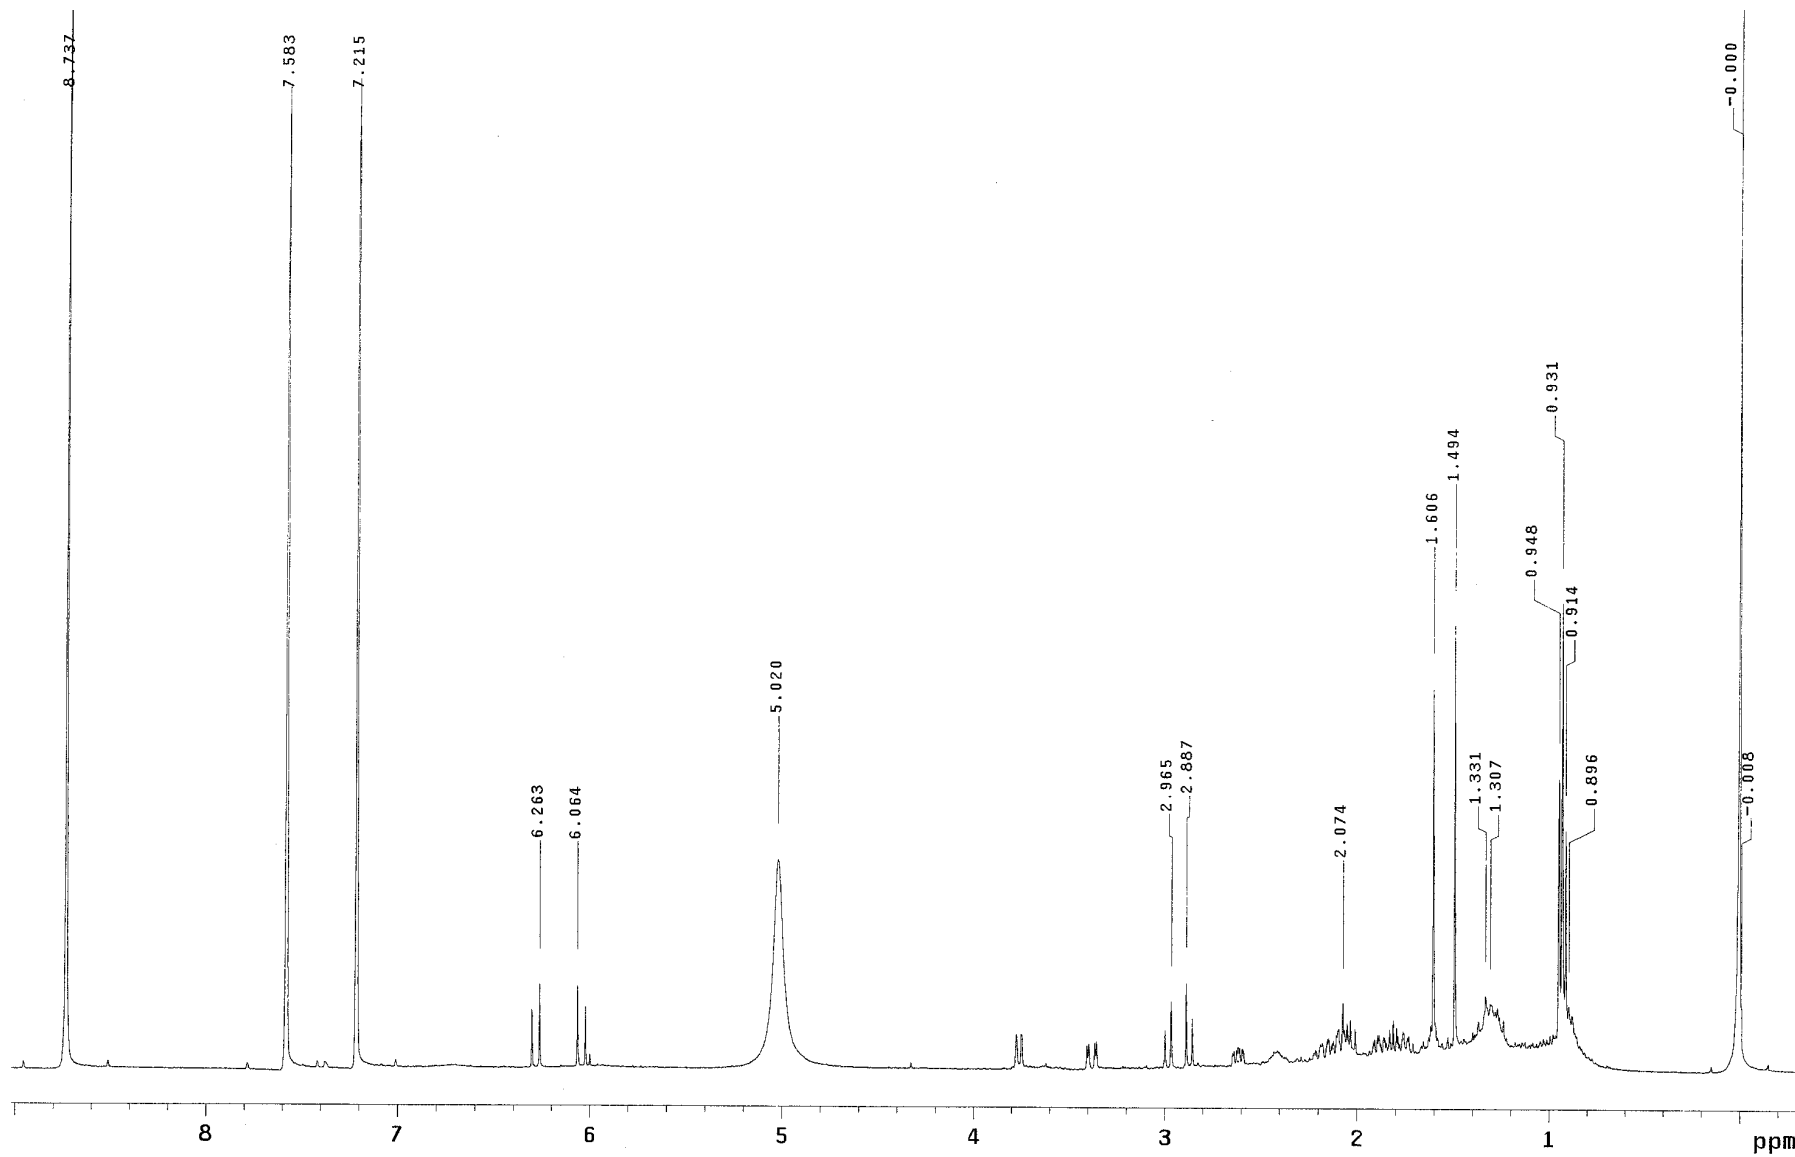

S1-3.  $^1\text{H}$  NMR spectrum (400 MHz) of compound **1** in  $\text{C}_5\text{D}_5\text{N}$ .

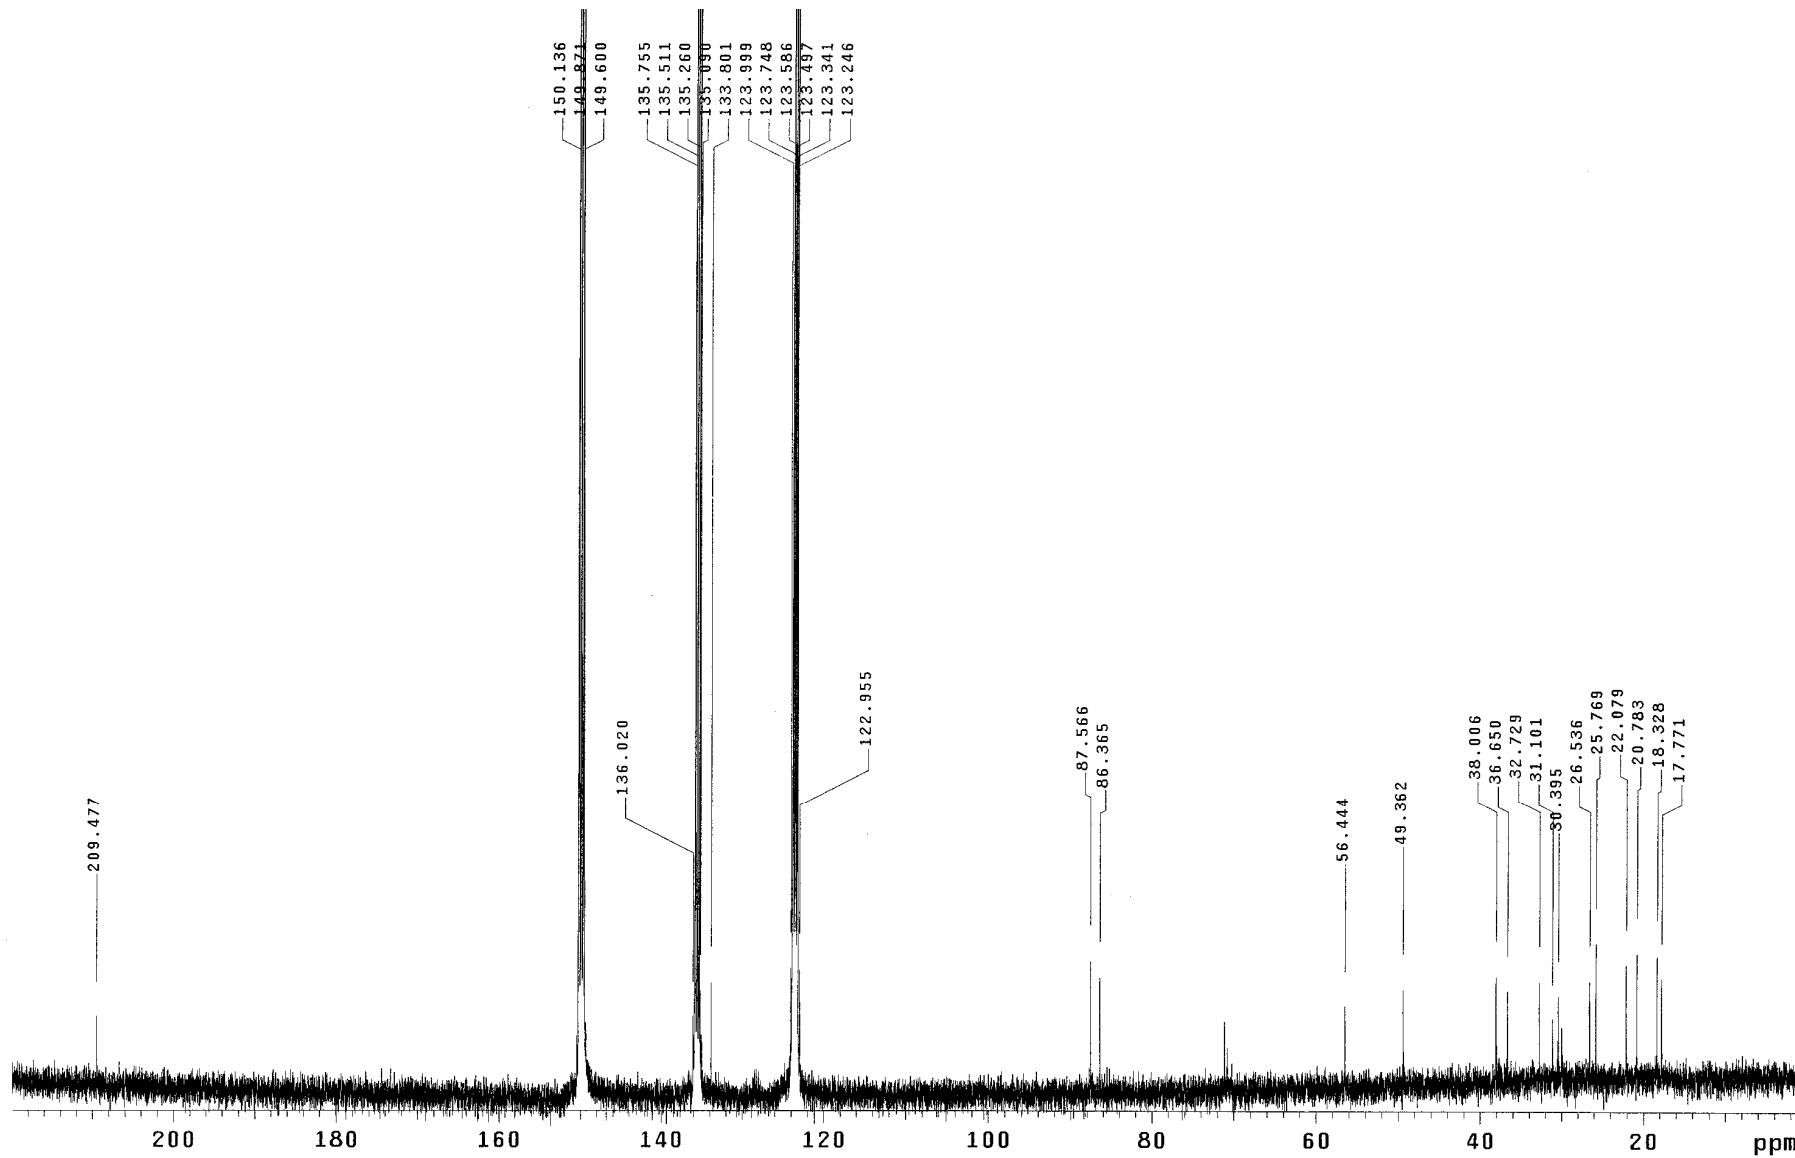

S1-4.  $^{13}\text{C}$  NMR spectrum (400 MHz) of compound **1** in  $\text{C}_5\text{D}_5\text{N}$ .

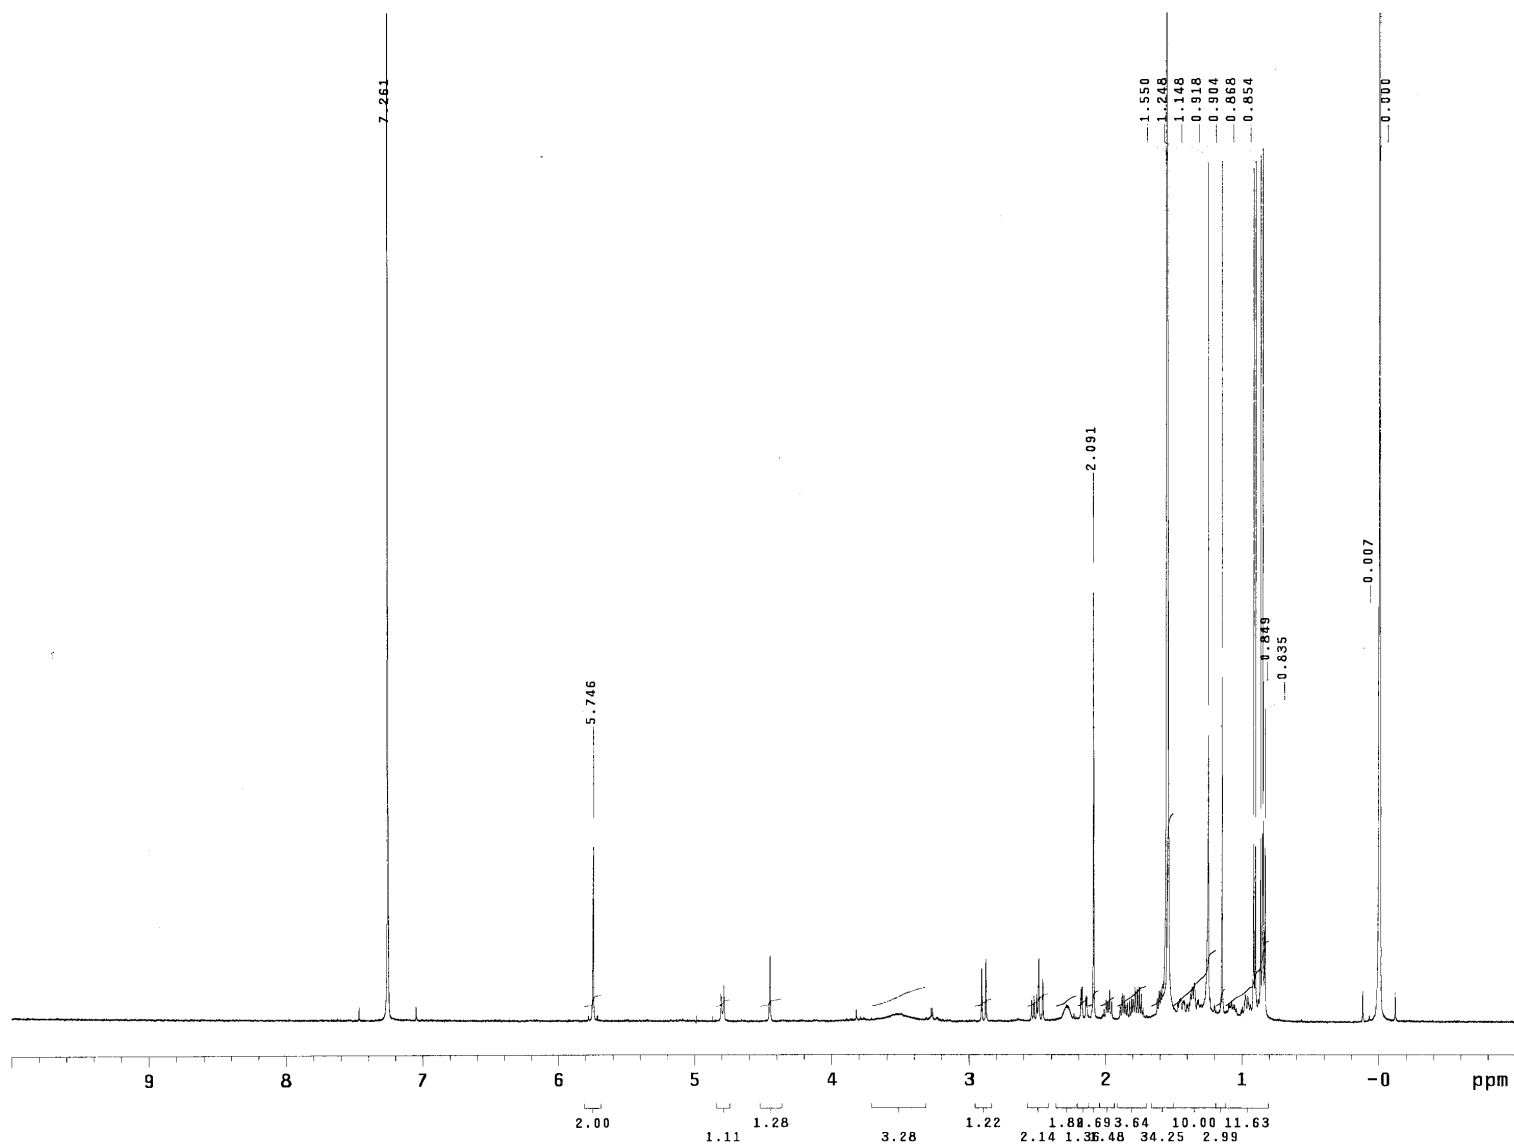

S2-1.  $^1\text{H}$  NMR spectrum (500 MHz) of compound **2** in  $\text{CDCl}_3$ .

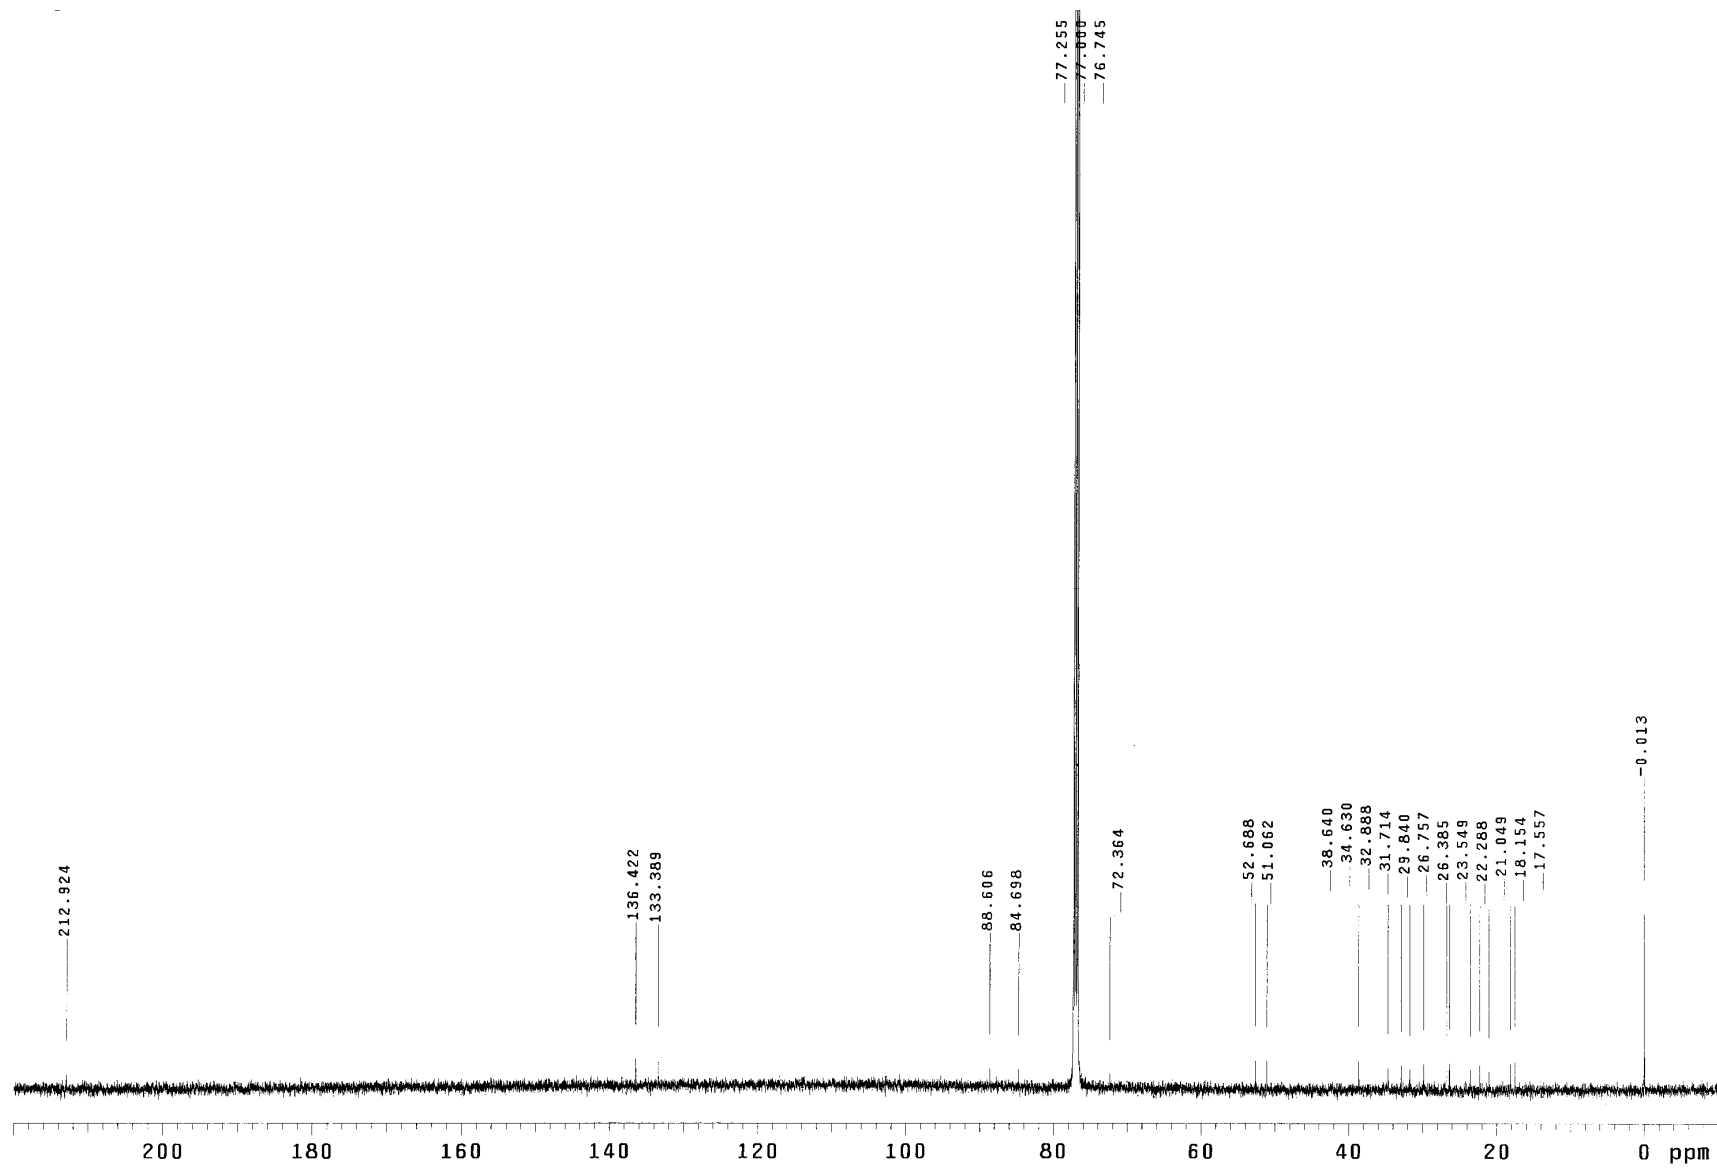

S2-2. <sup>13</sup>C NMR spectrum (500 MHz) of compound 2 in CDCl<sub>3</sub>.



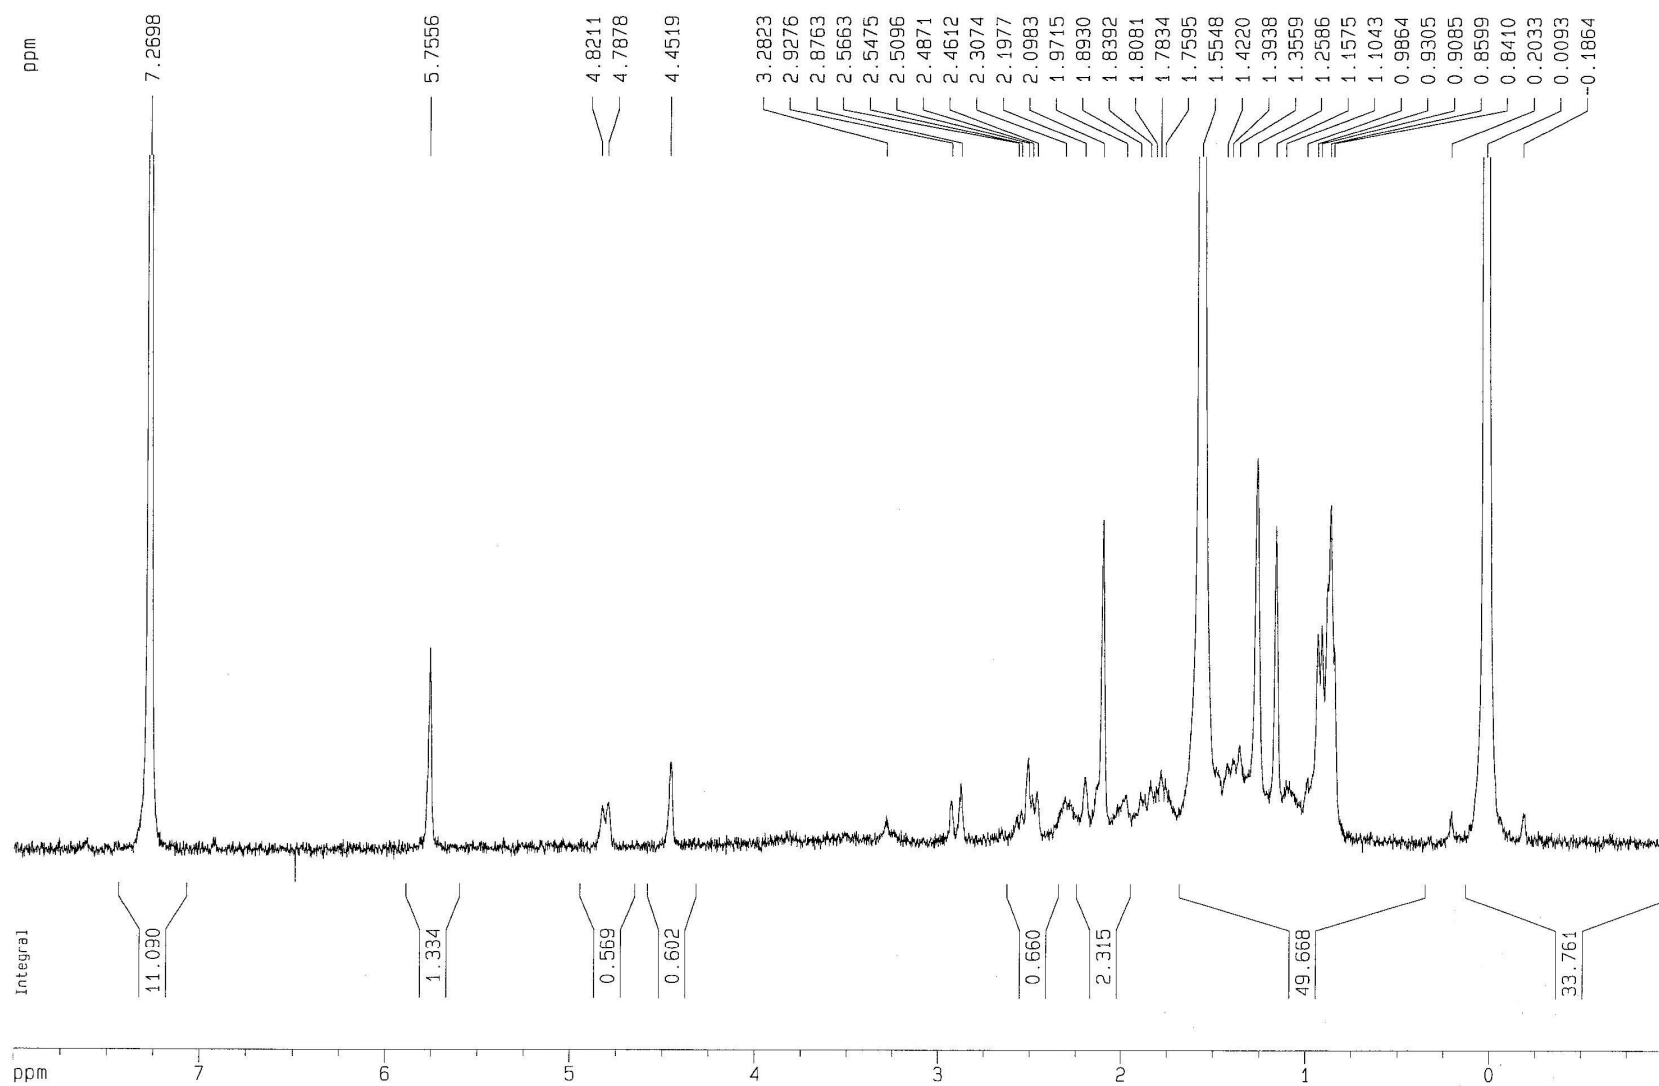

S2-3.  $^1\text{H}$  NMR spectrum (300 MHz) of compound **2** in  $\text{CDCl}_3$ .

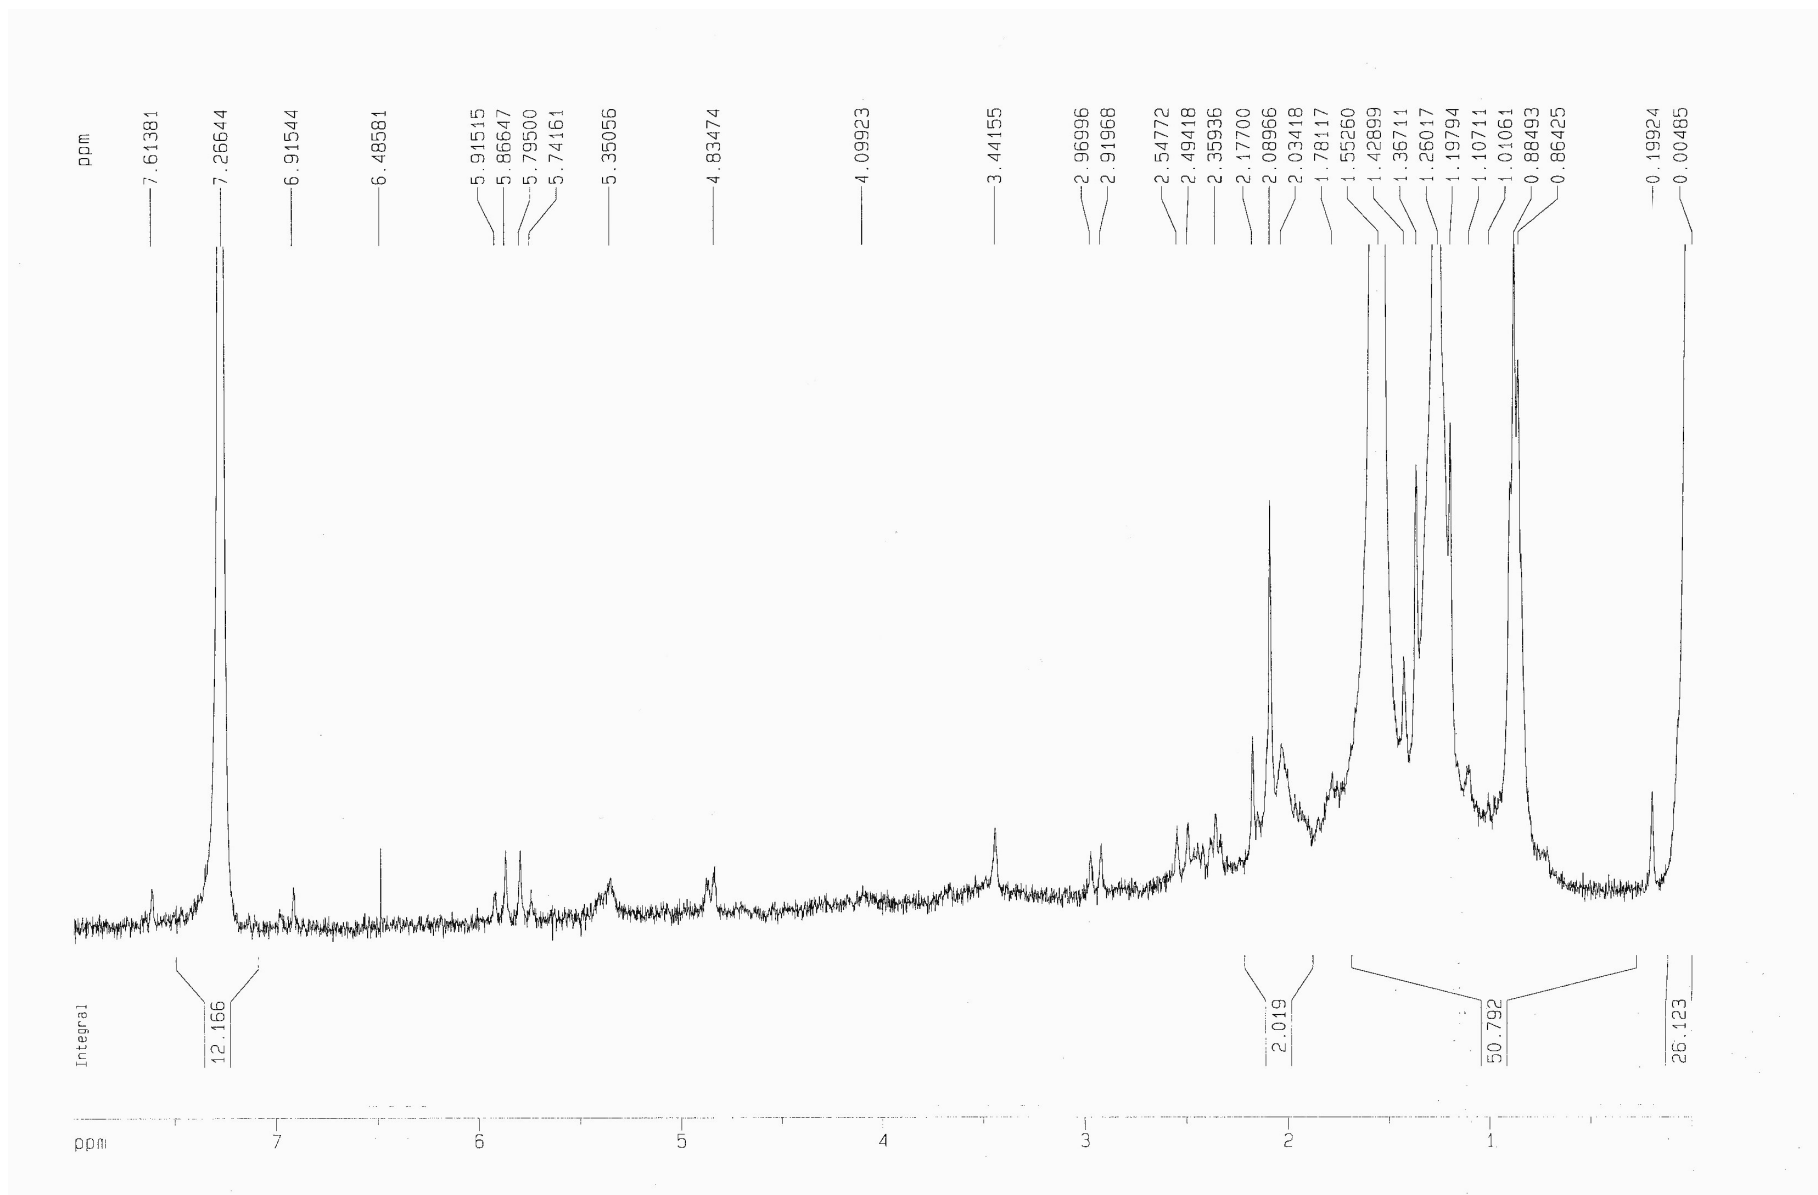

S2-4.  $^1\text{H}$  NMR spectrum (300 MHz) of acetate **1a** in  $\text{CDCl}_3$ .

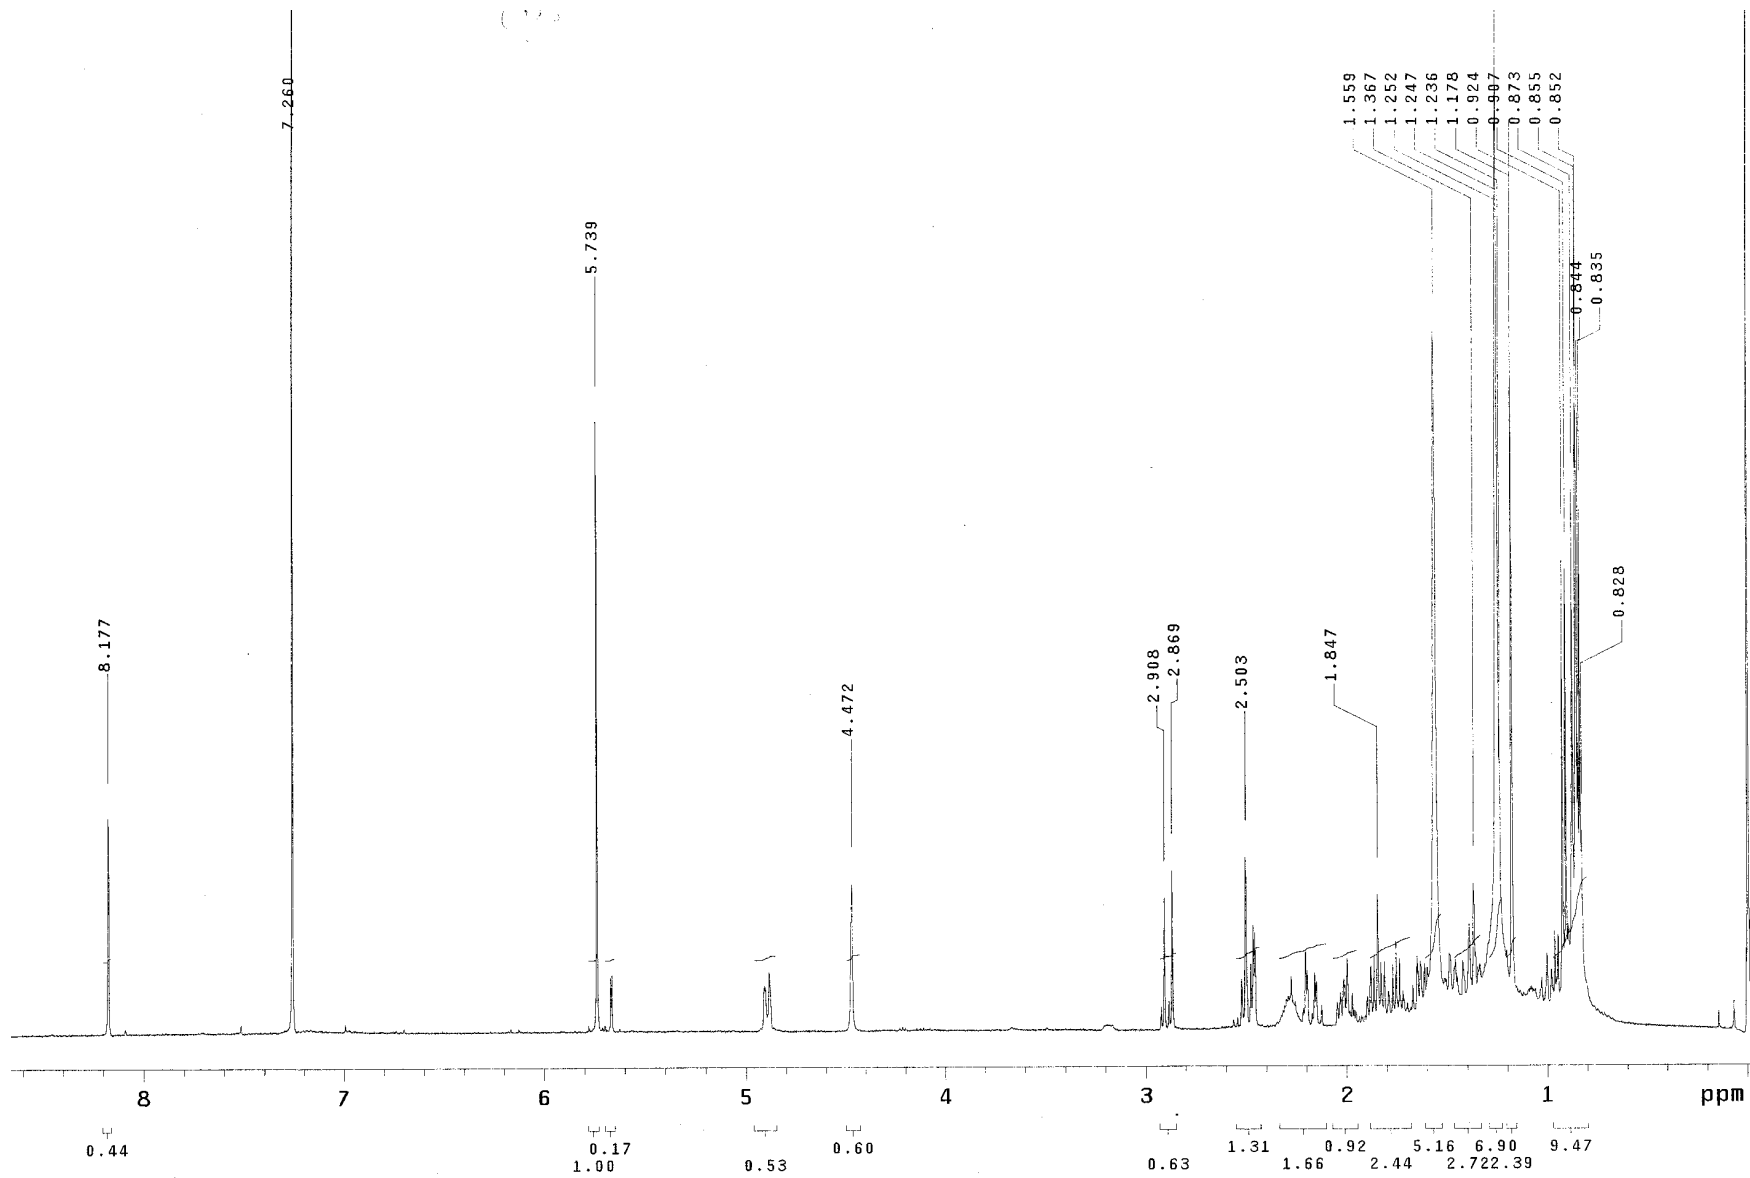

S3-1.  $^1\text{H}$  NMR spectrum (400 MHz) of compound **3** in  $\text{CDCl}_3$ .

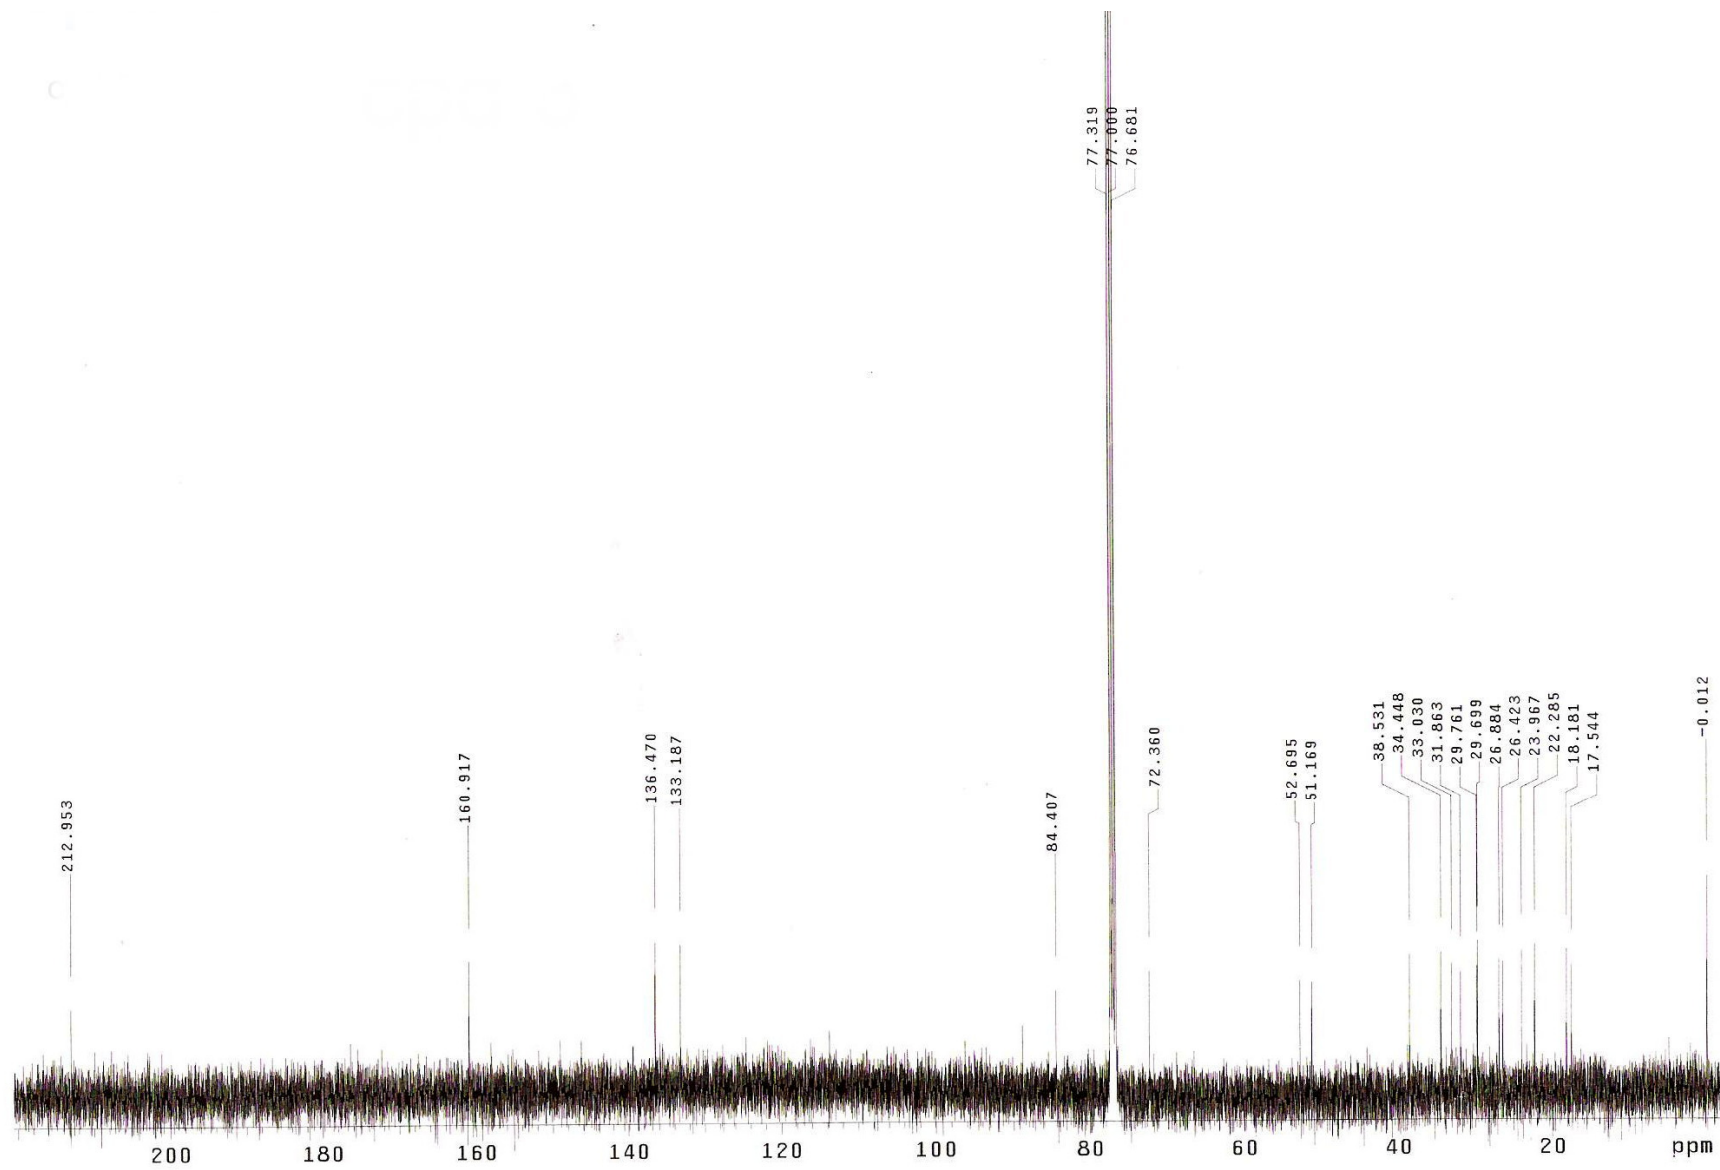

S3-2. <sup>13</sup>C NMR spectrum (400 MHz) of compound 3 in CDCl<sub>3</sub>.

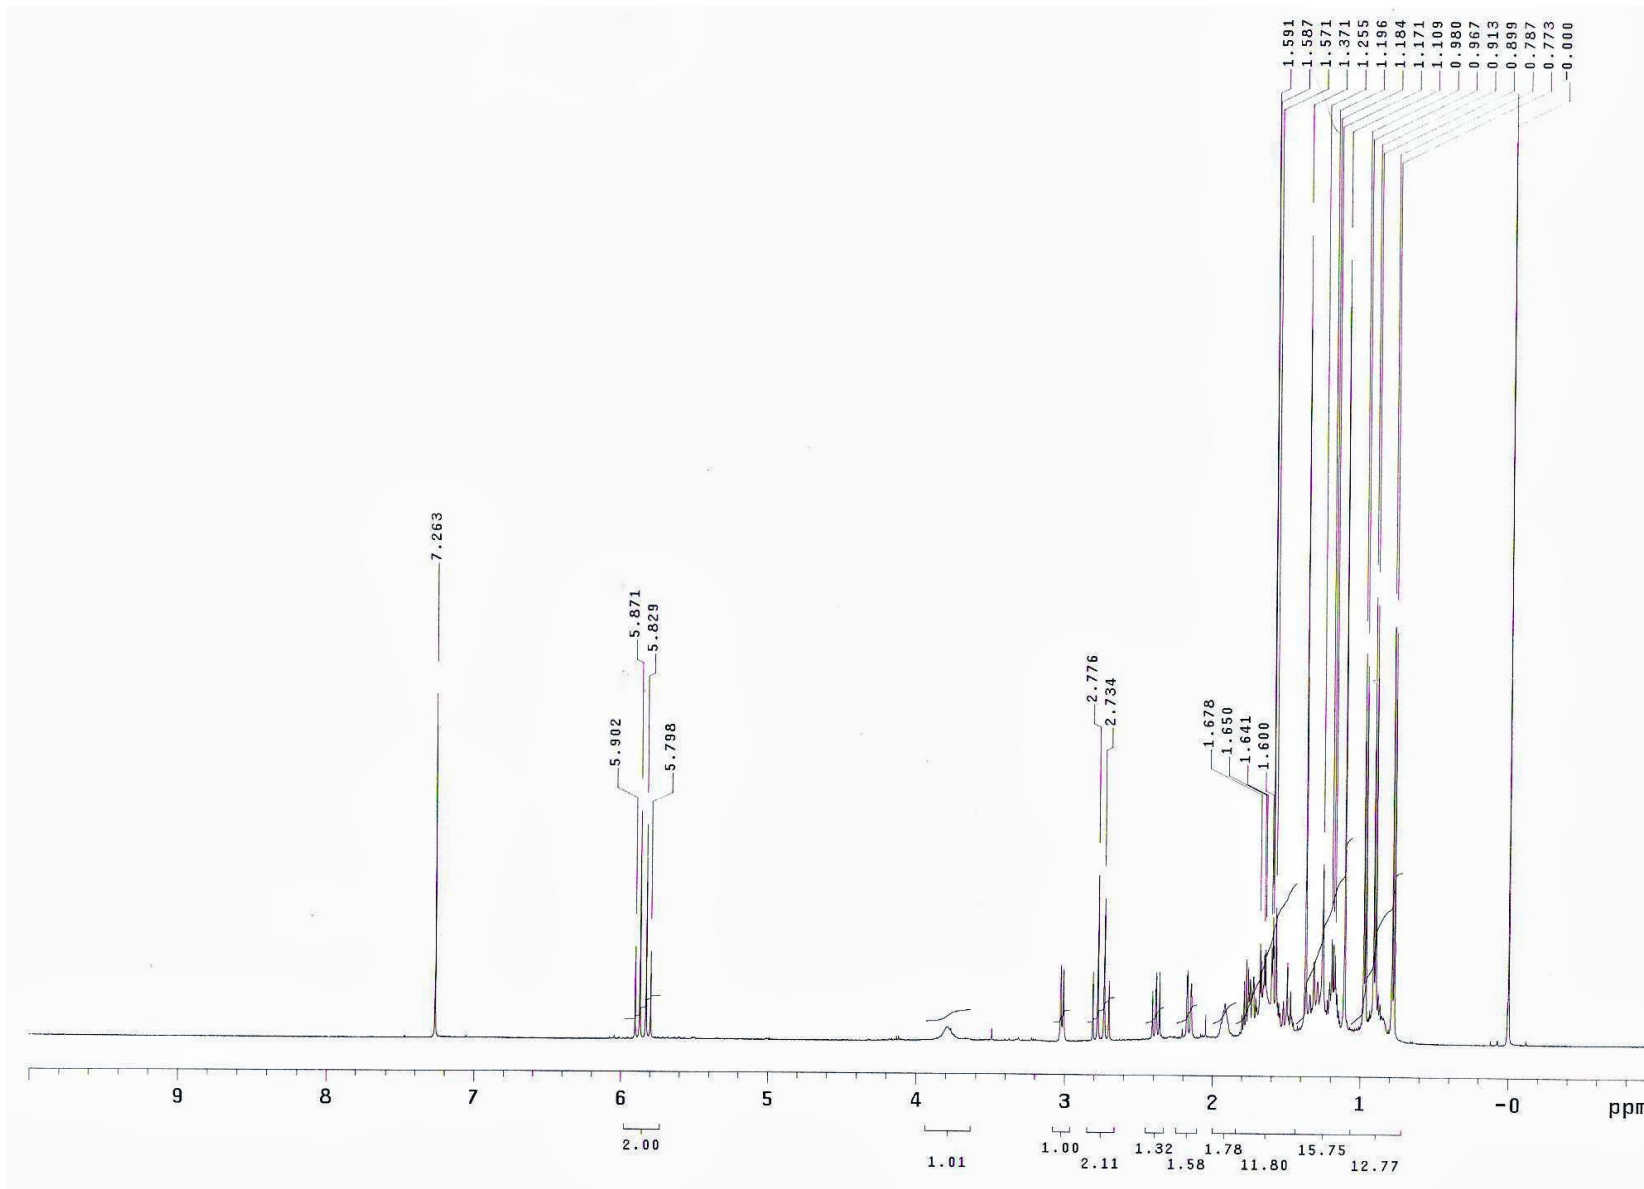

S4-1.  $^1\text{H}$  NMR spectrum (400 MHz) of compound **4** in  $\text{CDCl}_3$ .

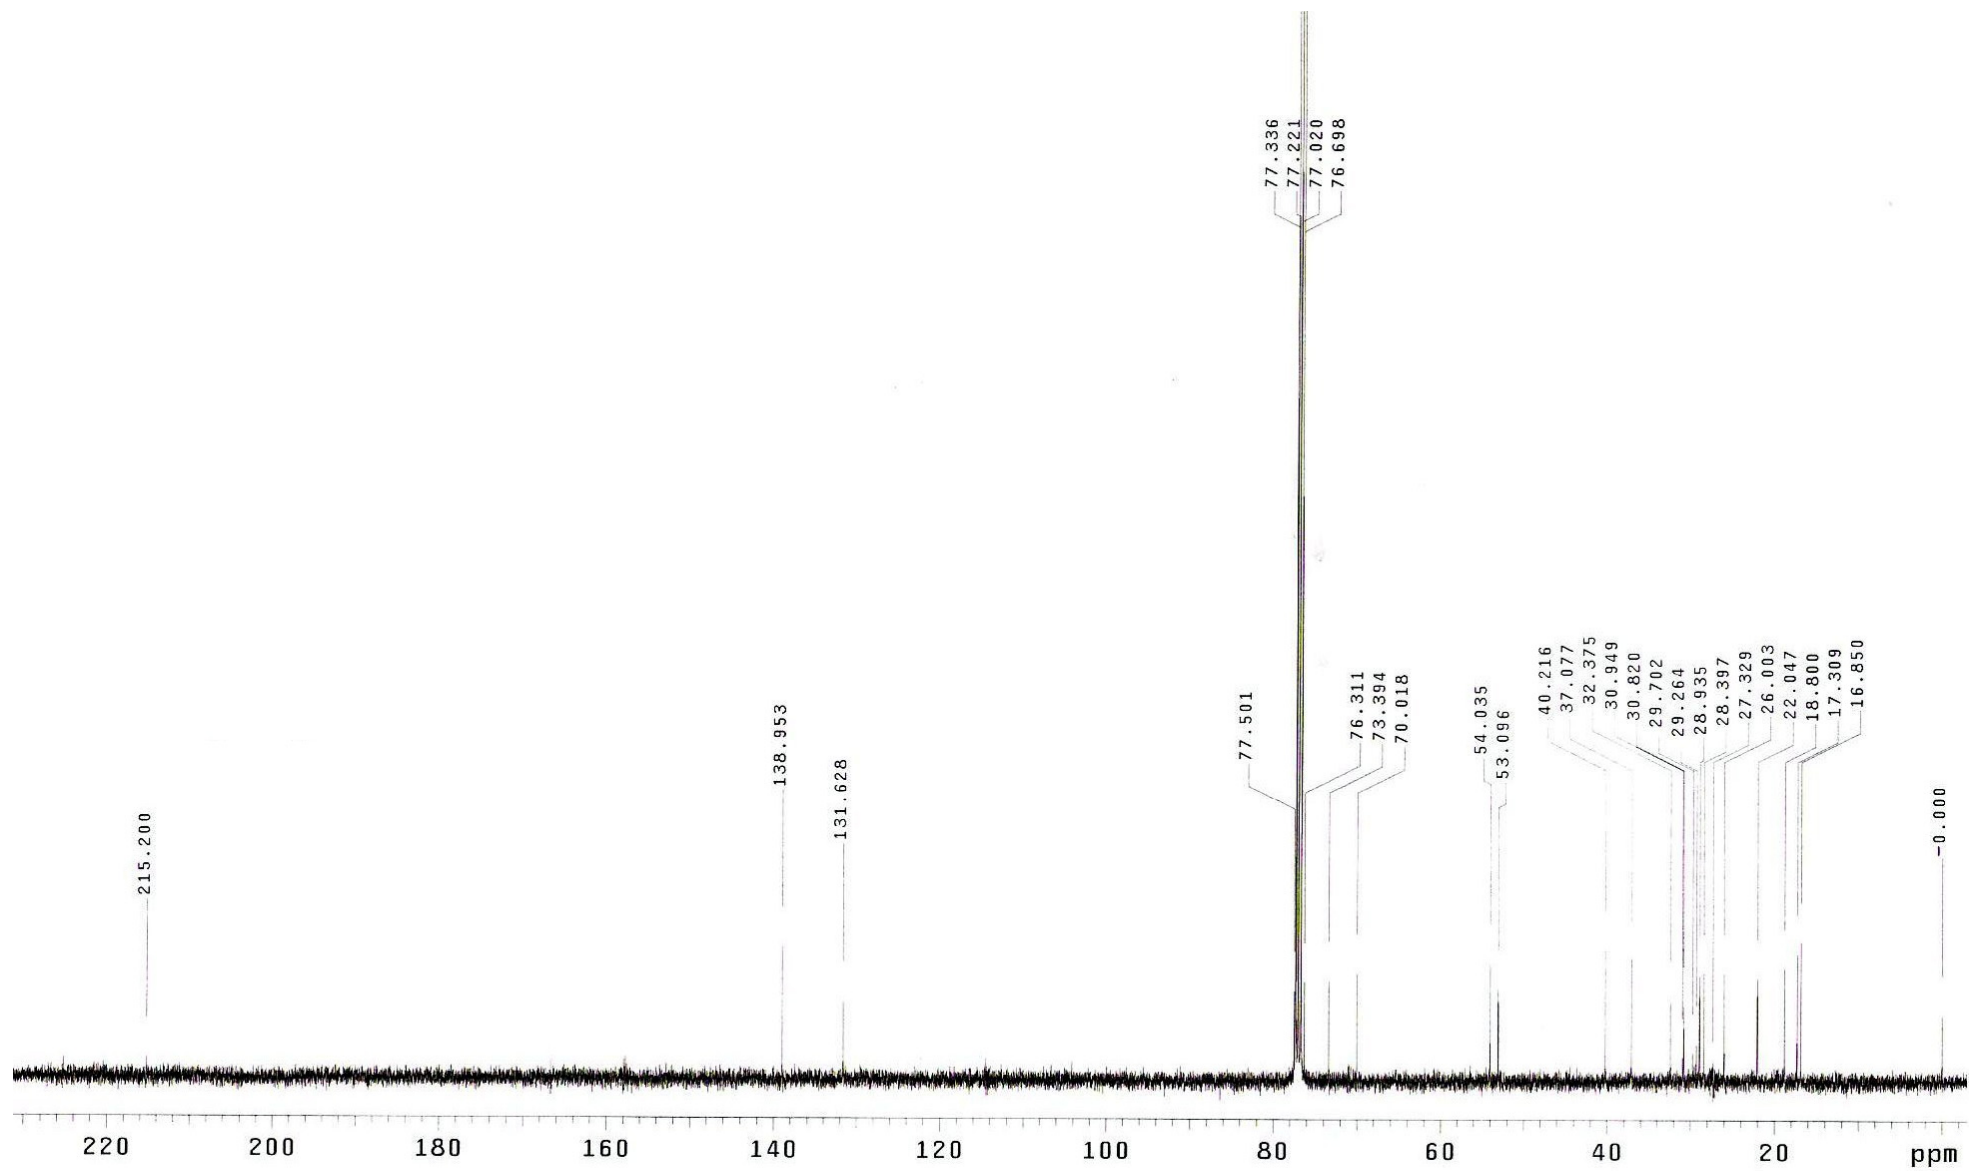

S4-2.  $^{13}\text{C}$  NMR spectrum (400 MHz) of compound 4 in  $\text{CDCl}_3$ .

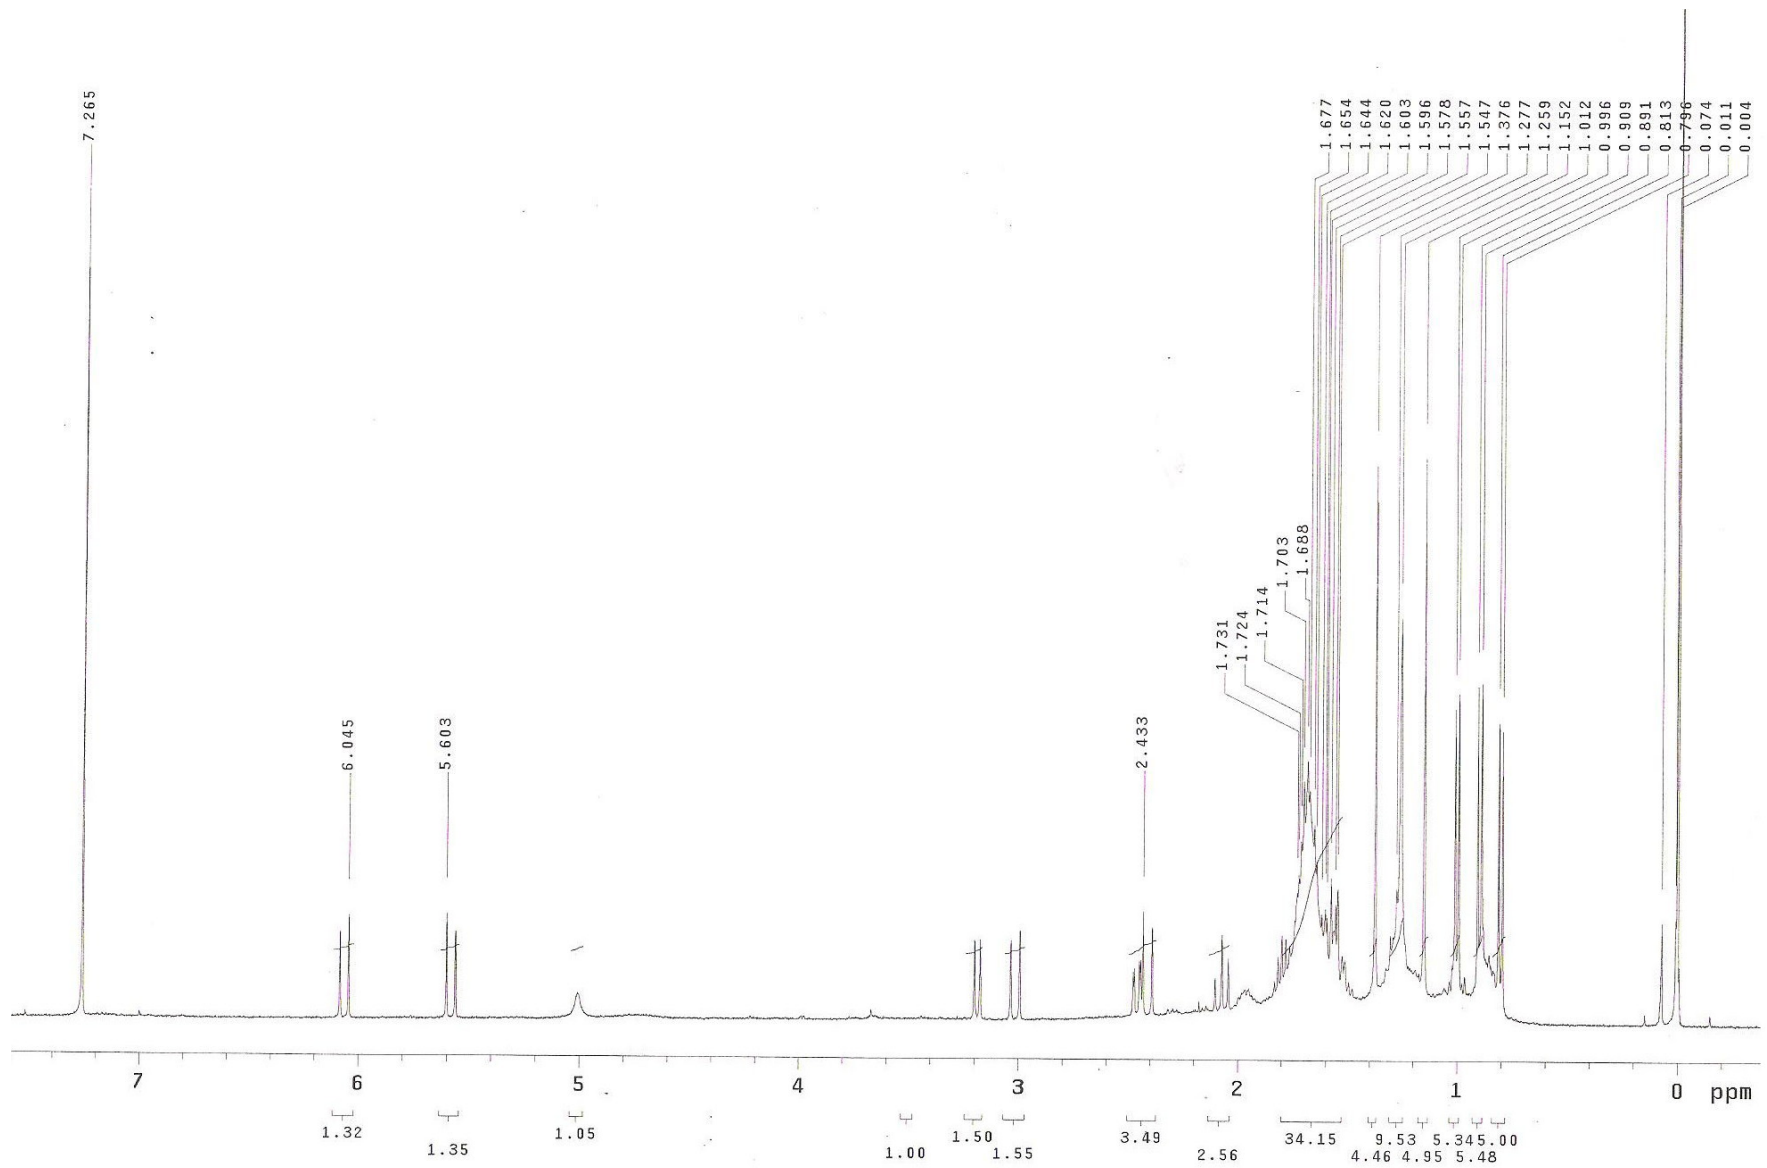

S5-1.  $^1\text{H}$  NMR spectrum (400 MHz) of compound **5** in  $\text{CDCl}_3$ .

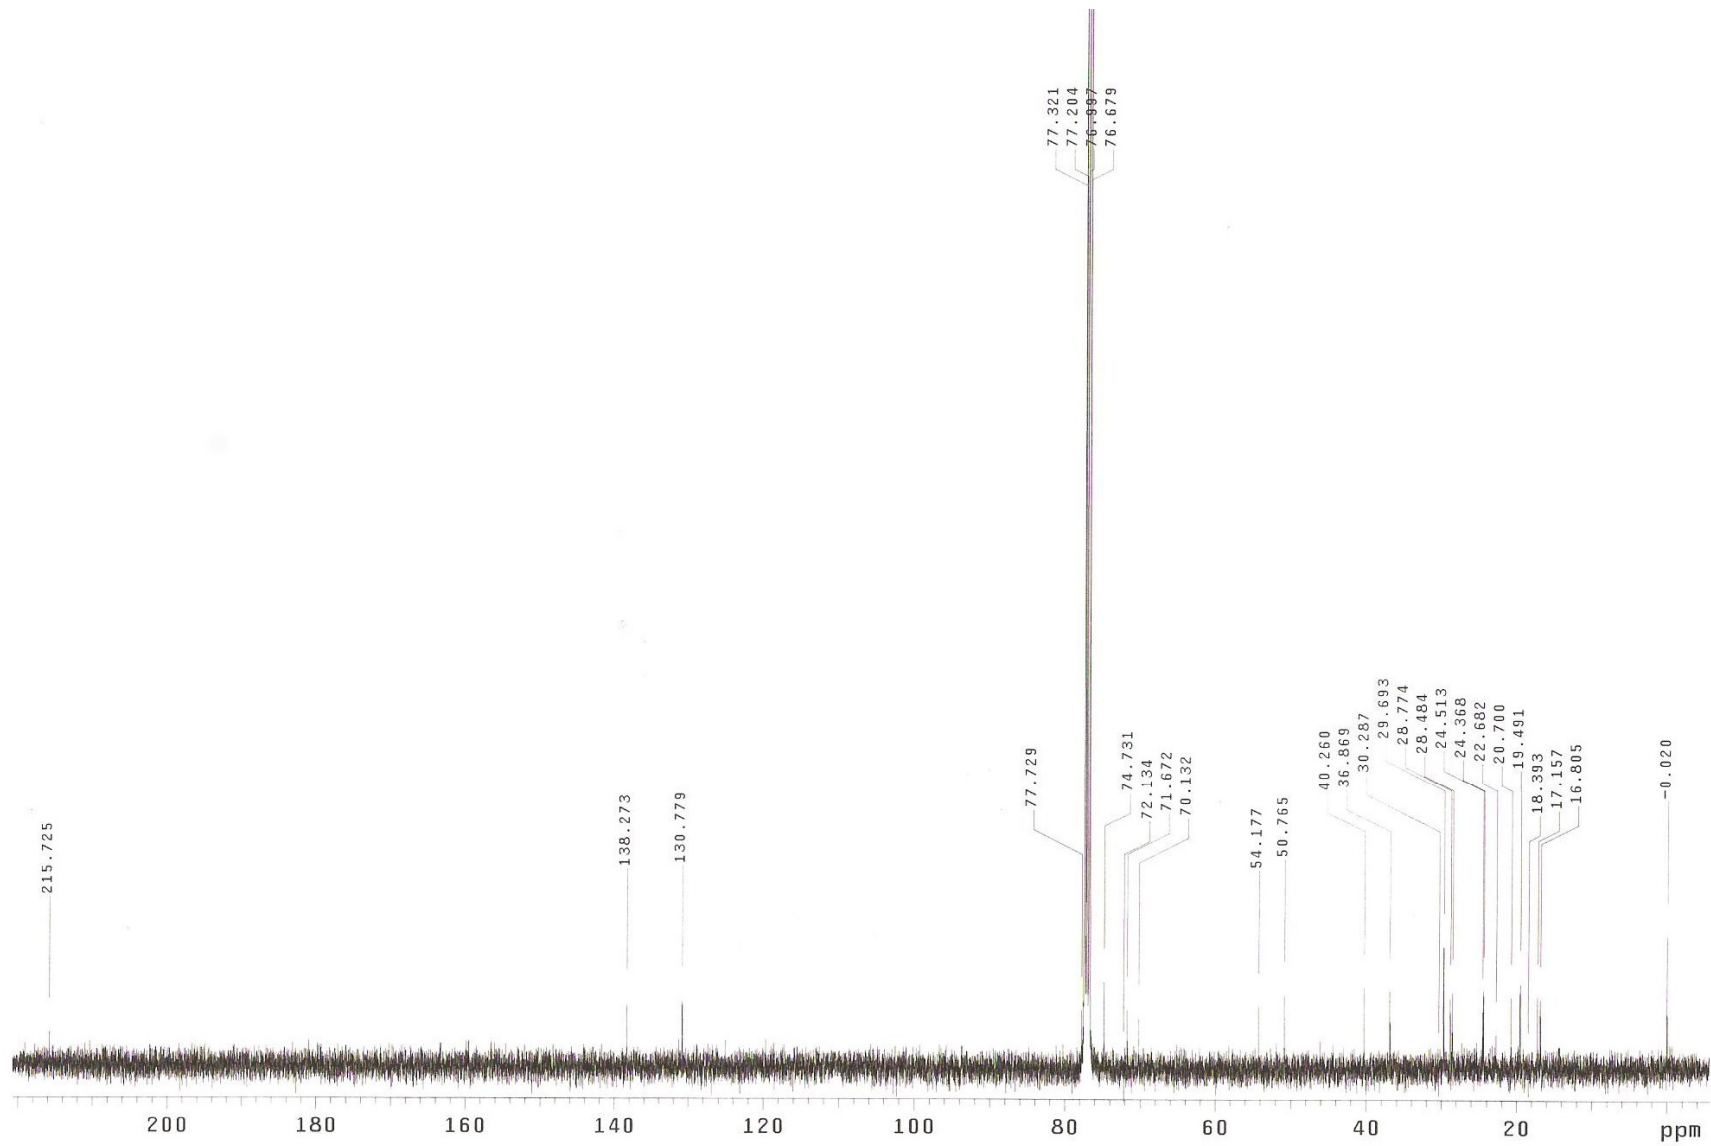

S5-2.  $^{13}\text{C}$  NMR spectrum (400 MHz) of compound **5** in  $\text{CDCl}_3$ .



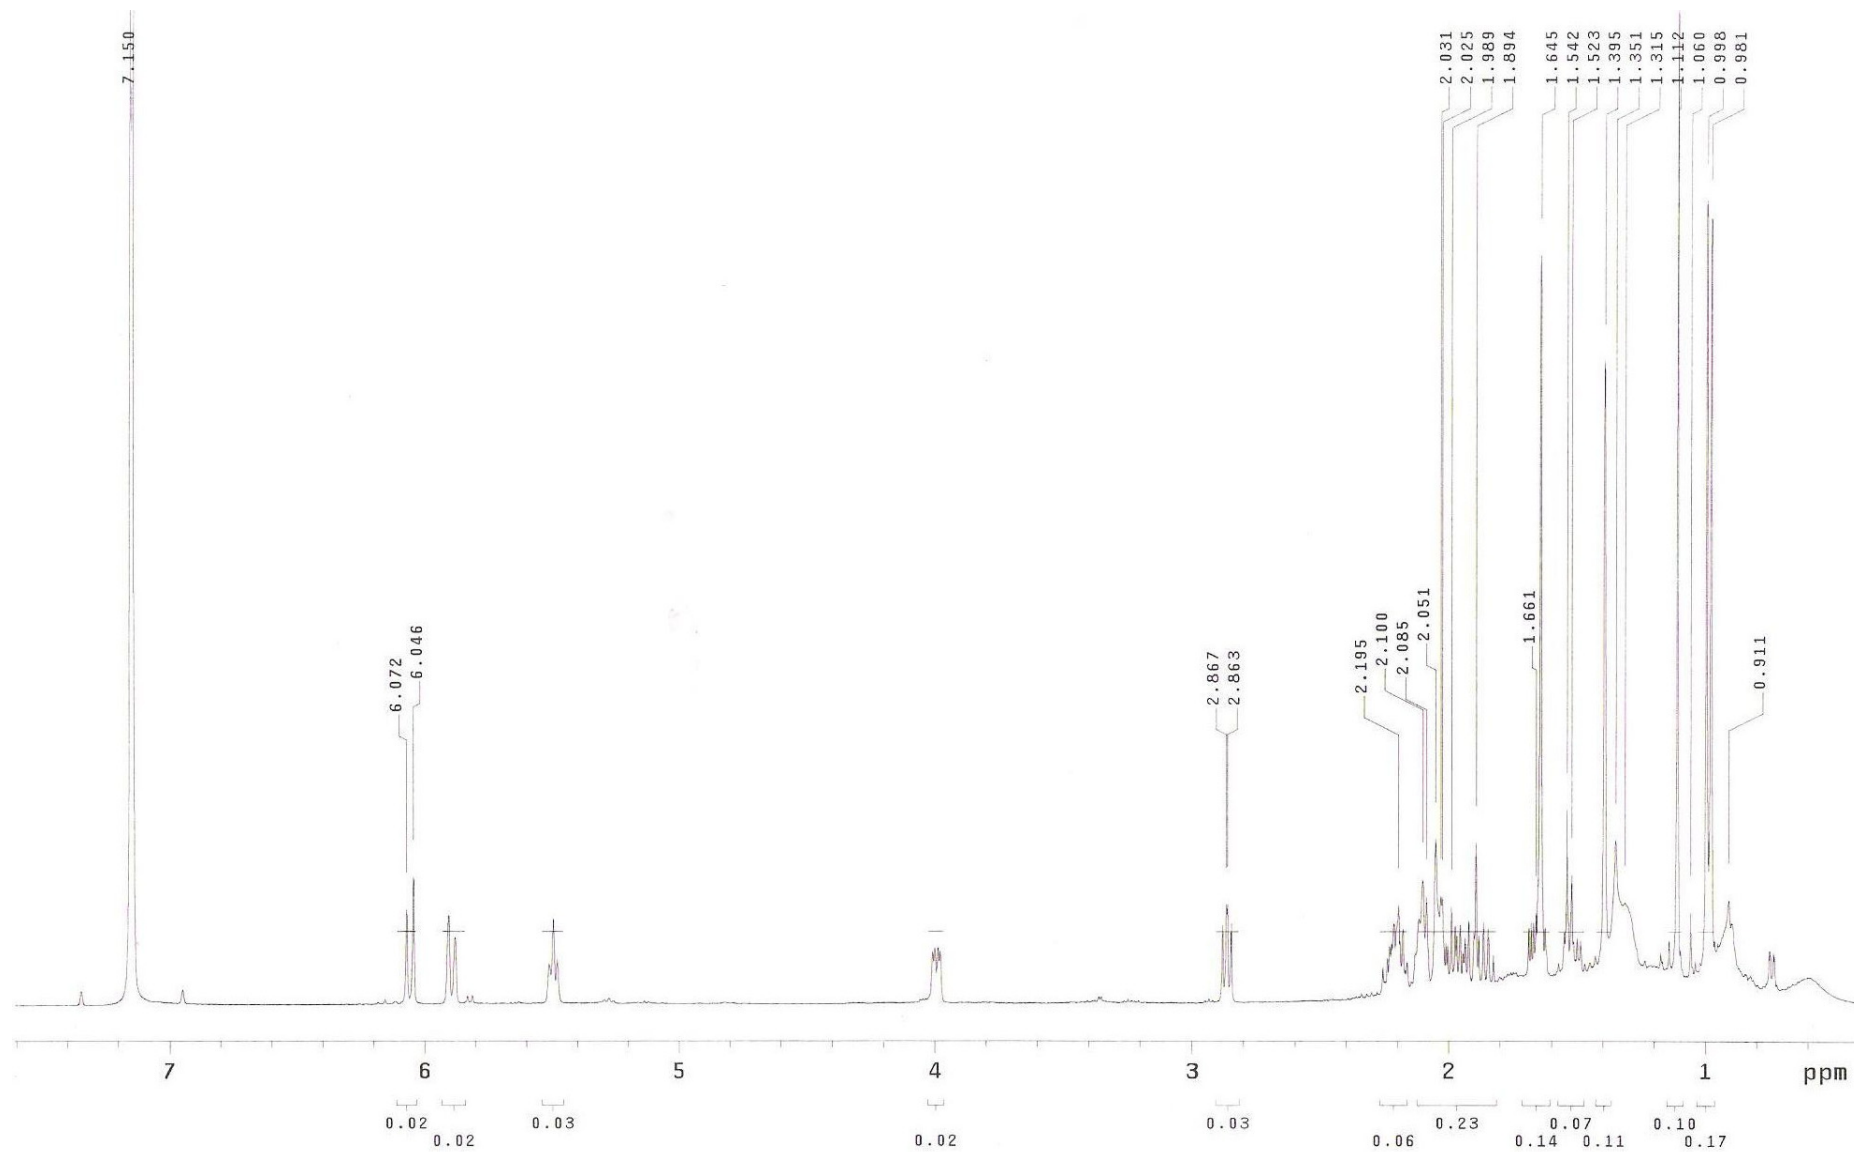

**S6-1.**  $^1\text{H}$  NMR spectrum (400 MHz) of compound **6** in  $\text{C}_6\text{D}_6$ .

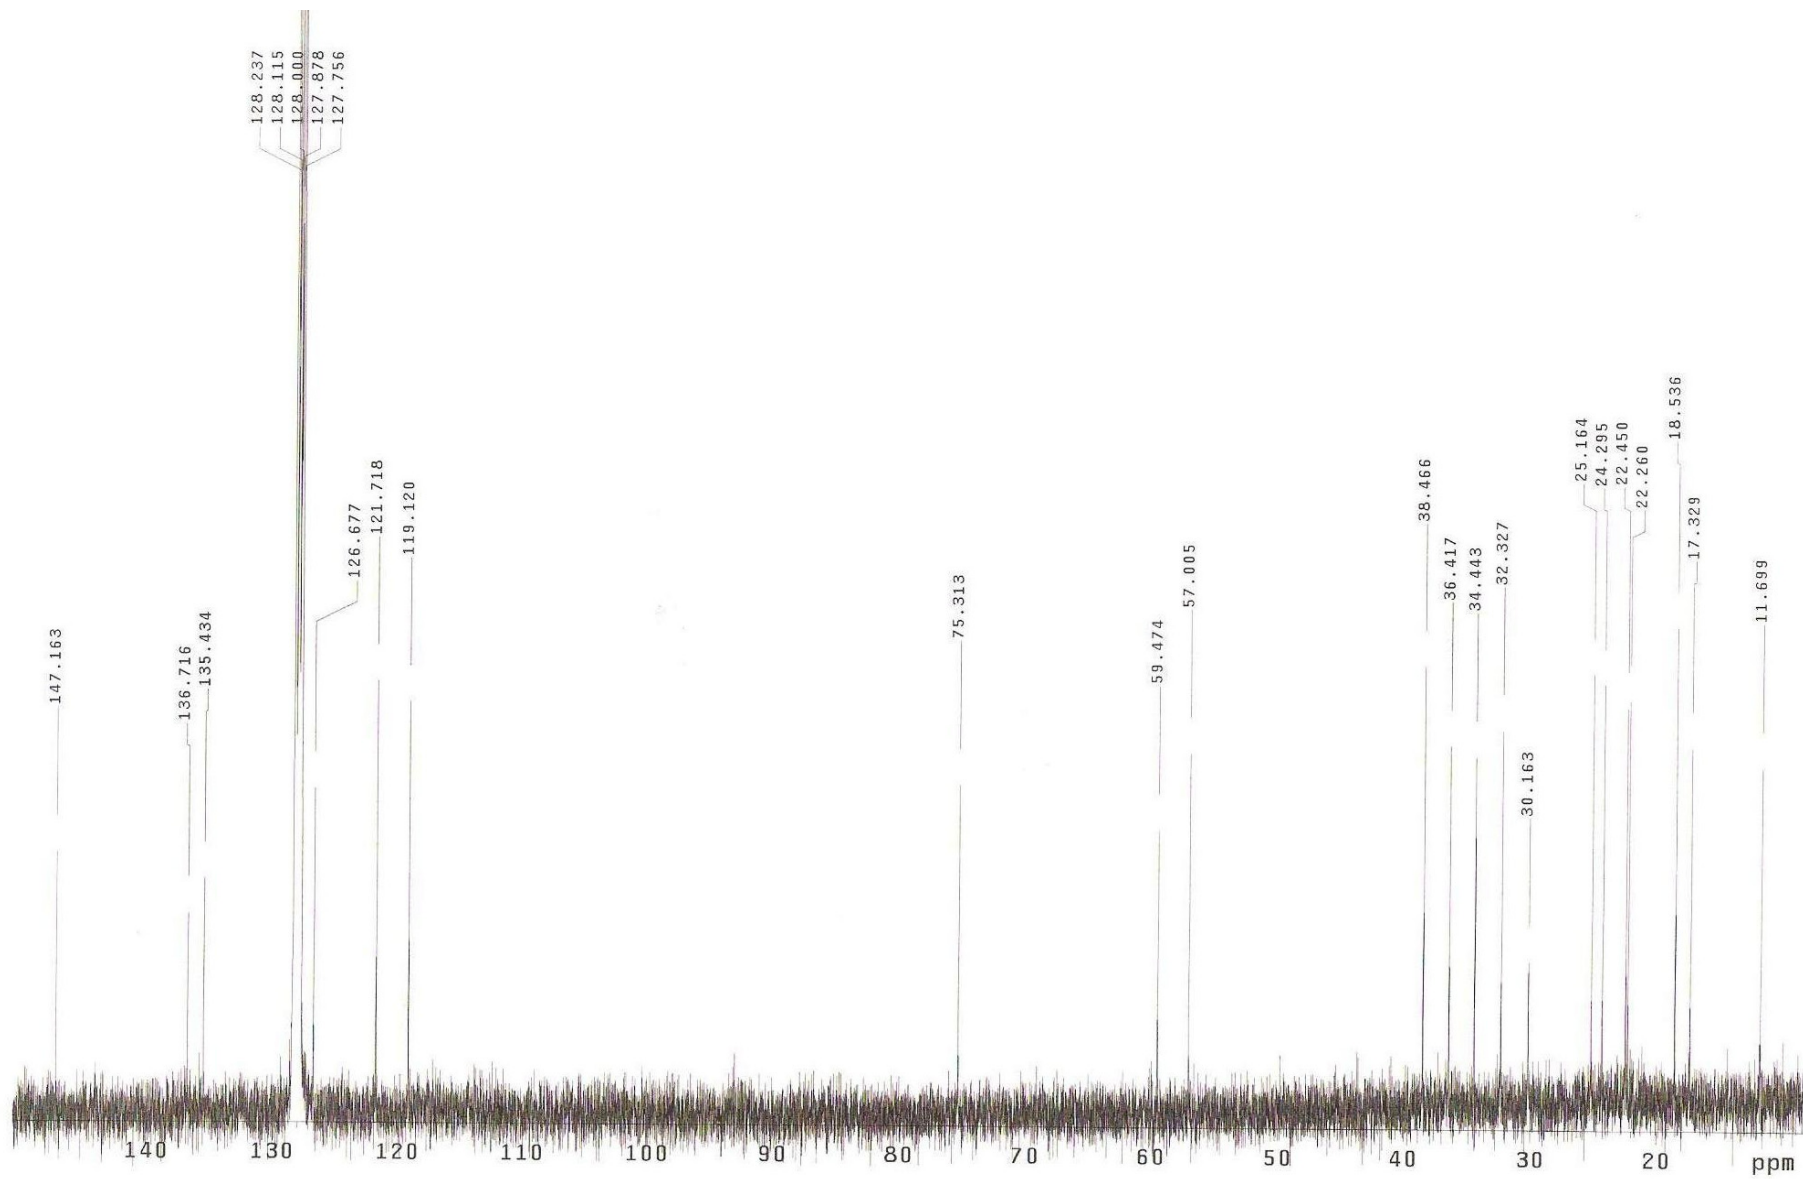

S6-2.  $^{13}\text{C}$  NMR spectrum (400 MHz) of compound **6** in  $\text{C}_6\text{D}_6$ .

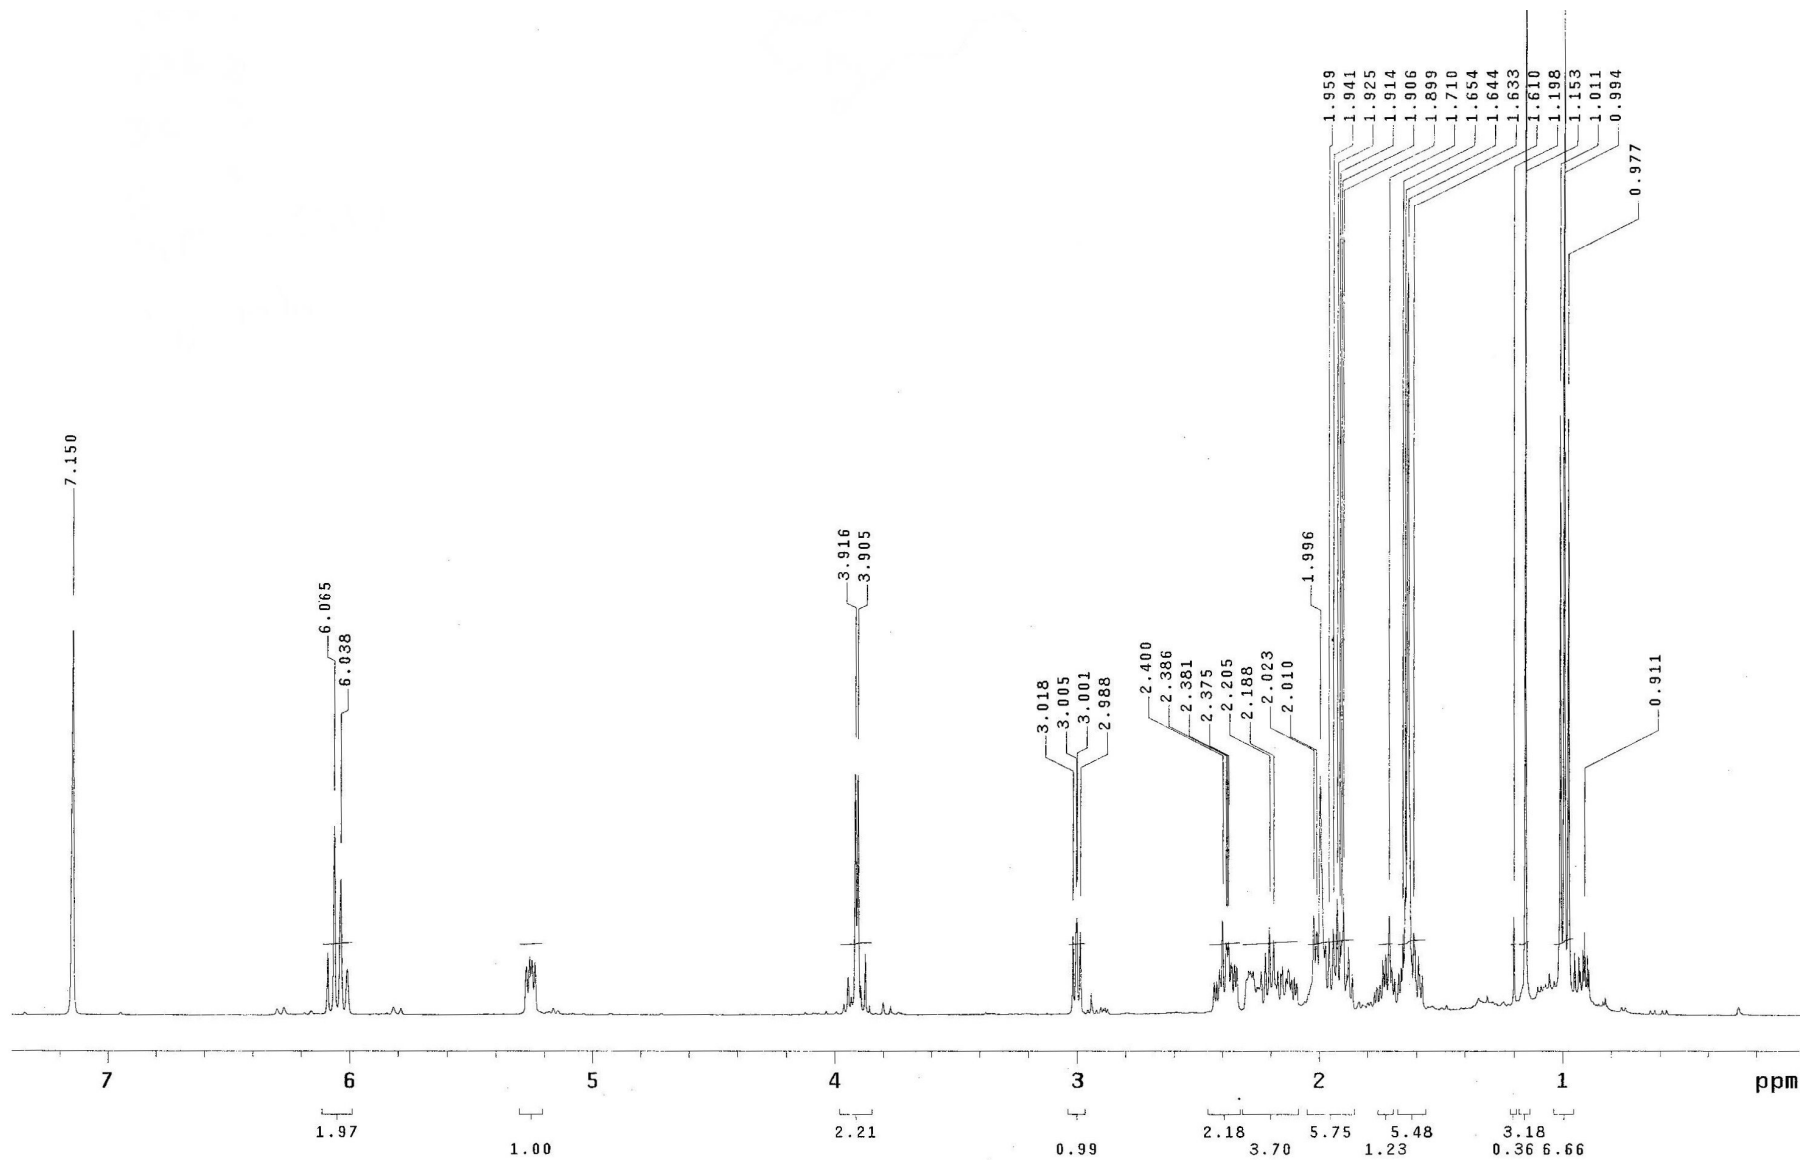

S7-1.  $^1\text{H}$  NMR spectrum (400 MHz) of compound 7 in  $\text{C}_6\text{D}_6$ .

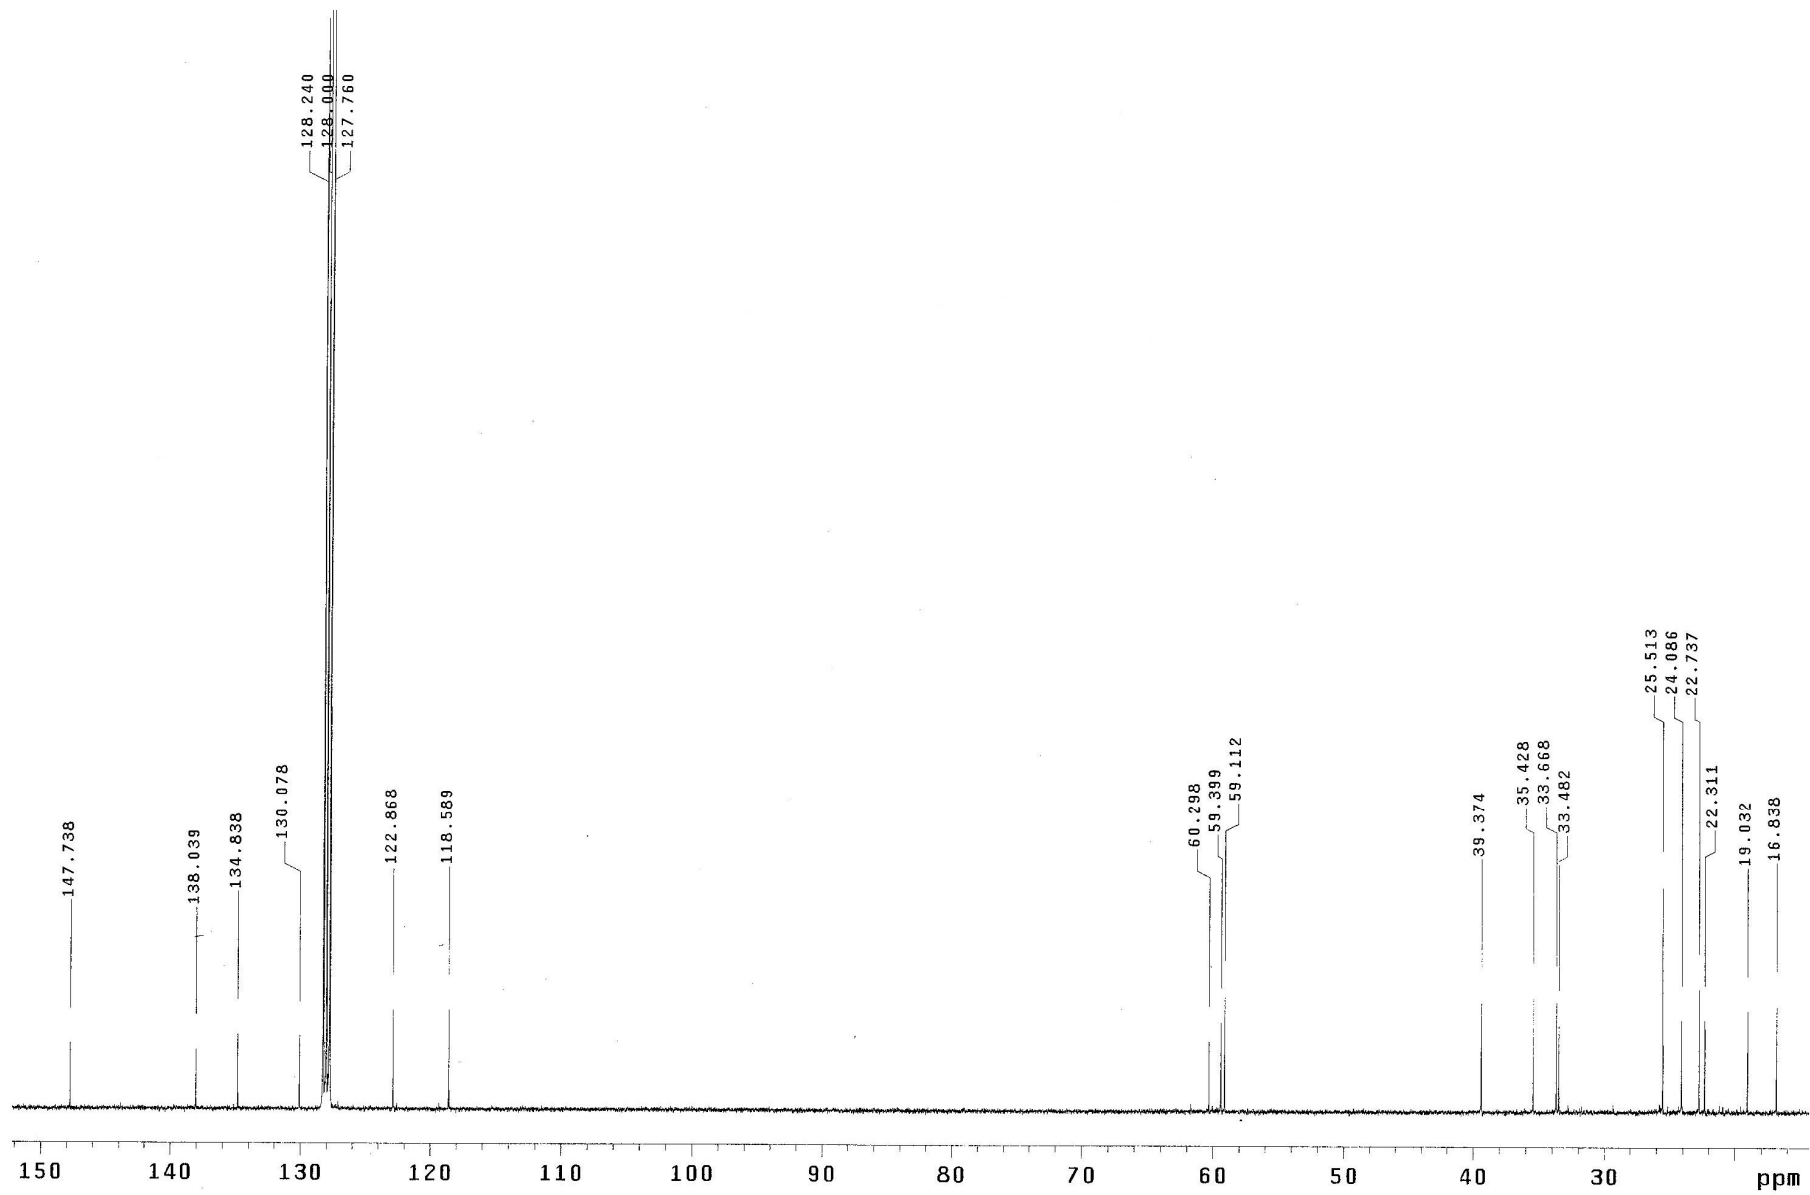

S7-2.  $^{13}\text{C}$  NMR spectrum (400 MHz) of compound **7** in  $\text{C}_6\text{D}_6$ .

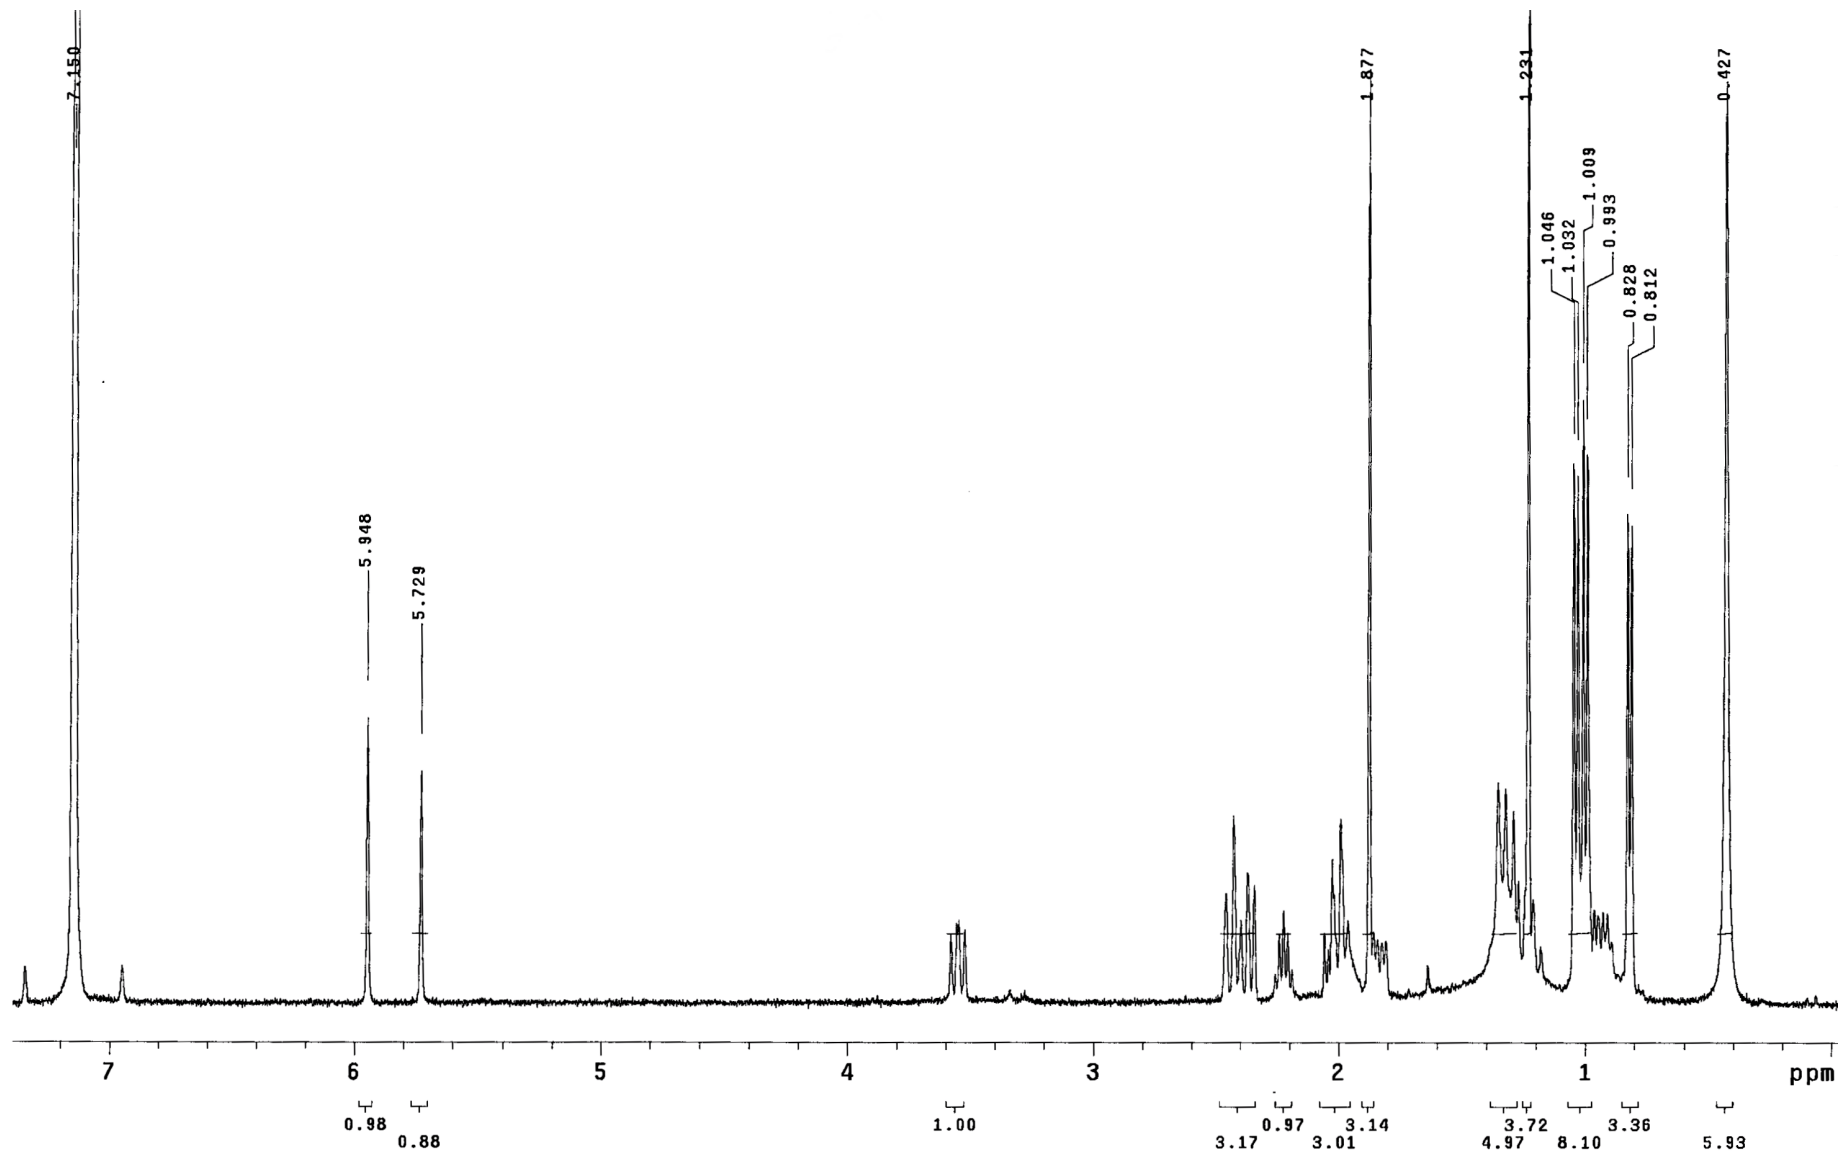

S8-1. <sup>1</sup>H NMR spectrum (400 MHz) of compound **8** in C<sub>6</sub>D<sub>6</sub>.

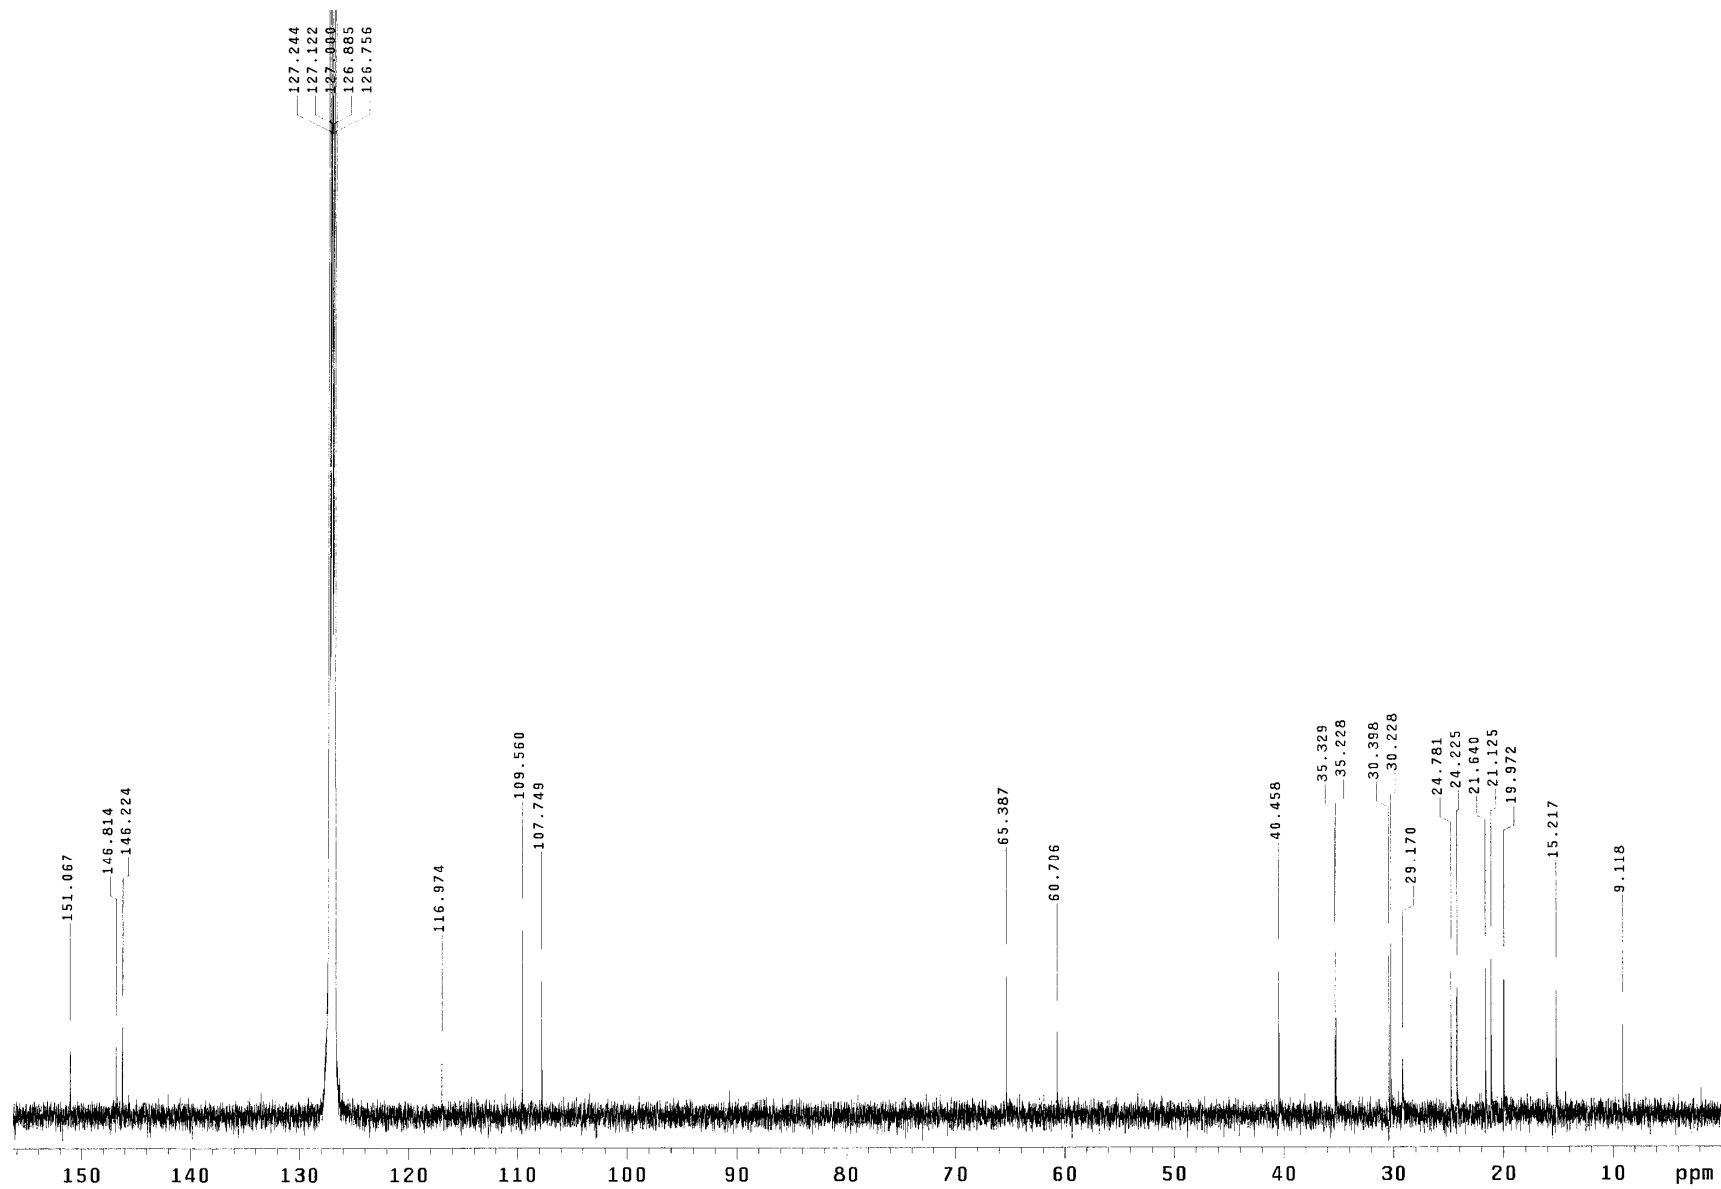

S8-2.  $^{13}\text{C}$  NMR spectrum (400 MHz) of compound **8** in  $\text{C}_6\text{D}_6$ .
